# Supplementary material
Source: publisher site journal article supplement (https://www.dovepress.com/article/322430)
Supplement: Supplementary file 1 [file get_supplementary_file.php]

## Supplementary material

### Supplementary Figures

**Supplementary Figure 1: Representations of some of the differentially expressed proteins between samples from five different grades of SARS-CoV-2-infected patients. The normalized quantitative values of individual proteins across all sample groups are depicted as box plots, which were generated using the Qlucore Omics Explorer version 3.7 (Lund, Sweden) (<https://glucore.com>).**

**Supplementary Figure 2: Comparative analyses of the canonical pathways and toxicity function of the different pairwise analyses of COVID-19 patients showing higher gene expression changes between severe and asymptomatic COVID-19 pairs than between mild or moderate and asymptomatic disease pairs. The figure was generated using the Ingenuity pathway Analysis ([www.qiagen.com](http://www.qiagen.com))**

**Supplementary Figure 3 A: The disease annotations of some of the 193 protein expression signatures among the different grades of SARS-CoV-2 infections with certain organs involved, including kidney, lung, and liver.**

Some of the implicated proteins are shown in pink. Some of these proteins act as growth factors, peptidases, transporters, and transmembrane receptors.

**Supplementary Fig. 3 B-C: The cellular processes, disease implications, and functional annotations of some of the 193 protein expression signatures among the different grades of SARS-CoV-2 infections.**

The cellular processes include activation of antigen-presenting cells, receptor-mediated endocytosis, and complement pathway. Some of these processes eventually affect the host immune system, resulting in different clinical manifestations of COVID-19, such as coagulation, inflammatory response, hemostasis, and complement activation. The figure was generated using the Ingenuity pathway Analysis ([www.qiagen.com](http://www.qiagen.com))

## **Supplementary Tables**

**Supplementary Table S1: List of the 193 differentially expressed proteins between samples from five different grades of COVID-19 patients.** (Highlighted in bold are some of the proteins that were previously identified by Messner et al. (12)).

**Supplementary Table S2: List of the 91 differentially expressed proteins between samples from MERS-CoV patients with different disease severity and samples from control subjects.**

**Supplementary Table S3:** Functional and cellular processes of the 49 overlapping proteins between 193 and 91 differentially expressed proteins in COVID-19 and MERS-CoV, respectively.

**Supplementary Table S4: List of the 49 overlapping proteins between 193 and 91 differentially expressed proteins in COVID-19 and MERS-CoV respectively with their expressions shown among the COVID-19 samples.** (Highlighted in bold are some of the proteins that have also been previously identified by Messner et al (12)).

Supplementary Figure 1: Representations of some of the differentially expressed proteins between samples from five different grades of SARS-CoV-2-infected patients. The normalized quantitative values of individual proteins across all sample groups are depicted as box plots, which were generated using the Qlucore Omics Explorer version 3.7 (Lund, Sweden) (<https://qlucore.com>).

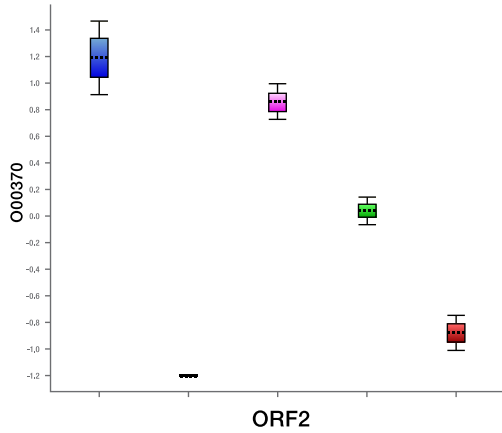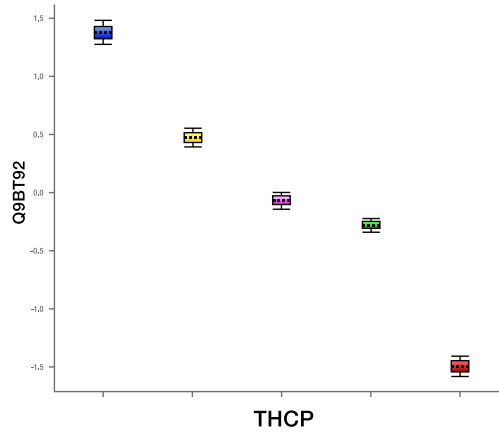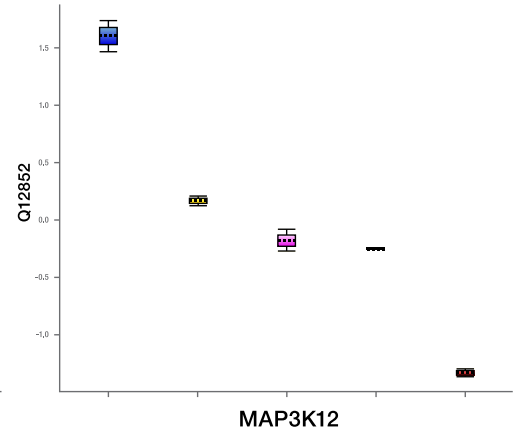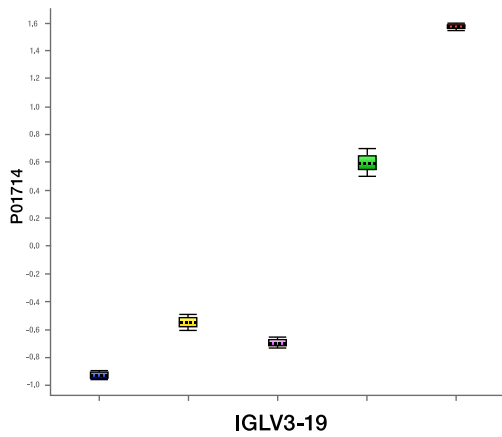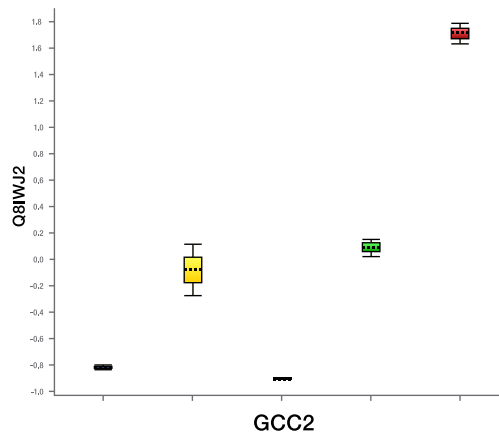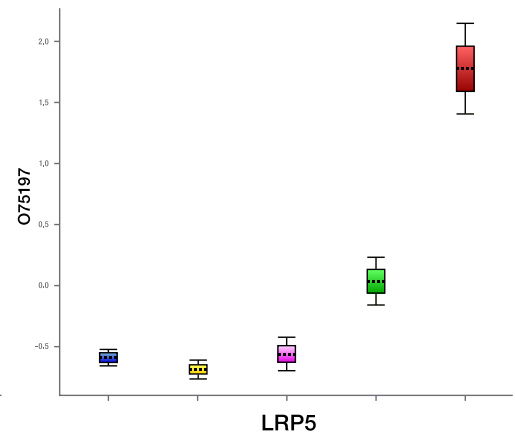

■ CVD19-ASYMPT 
 ■ CVD19-MILD 
 ■ CVD19-MOD 
 ■ CVD-19-SEV-R 
 ■ CVD-19-SEV-D

Supplementary Figure 2: Comparative analyses of the canonical pathways and toxicity function of the different pairwise analyses of COVID-19 patients showing higher gene expression changes between severe and asymptomatic COVID-19 pairs than between mild or moderate and asymptomatic disease pairs. The figure was generated using the Ingenuity pathway Analysis ([www.qiagen.com](http://www.qiagen.com))

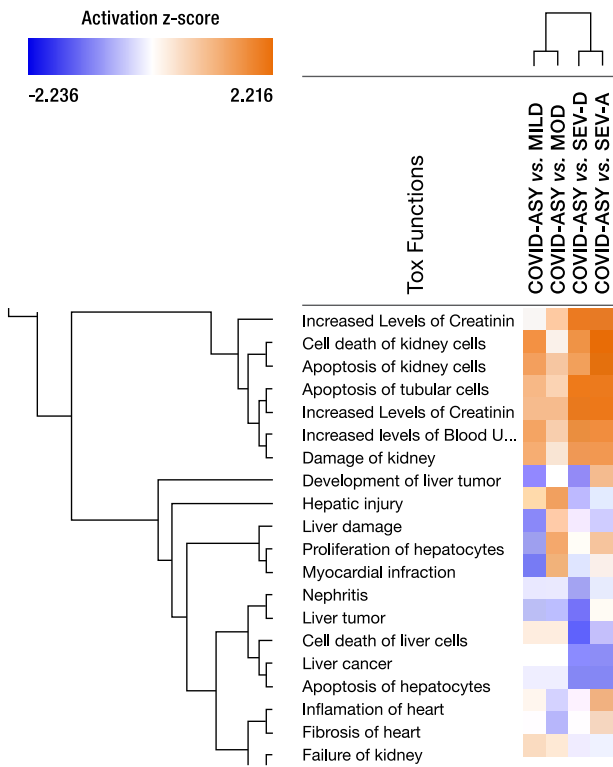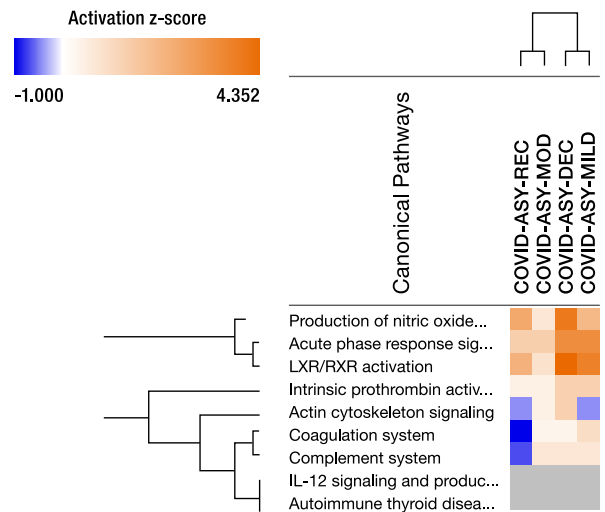

Supplementary Figure 3 A: The disease annotations of some of the 193 protein expression signatures among the different grades of SARS-CoV-2 infections with certain organs involved, including kidney, lung, and liver. Some of the implicated proteins are shown in pink. Some of these proteins act as growth factors, peptidases, transporters, and transmembrane receptors. Supplementary Fig. 3 B-C: The cellular processes, disease implications, and functional annotations of some of the 193 protein expression signatures among the different grades of SARS-CoV-2 infections. The cellular processes include activation of antigen-presenting cells, receptor-mediated endocytosis, and complement pathway. Some of these processes eventually affect the host immune system, resulting in different clinical manifestations of COVID-19, such as coagulation, inflammatory response, hemostasis, and complement activation. The figure was generated using the Ingenuity pathway Analysis ([www.qiagen.com](http://www.qiagen.com))

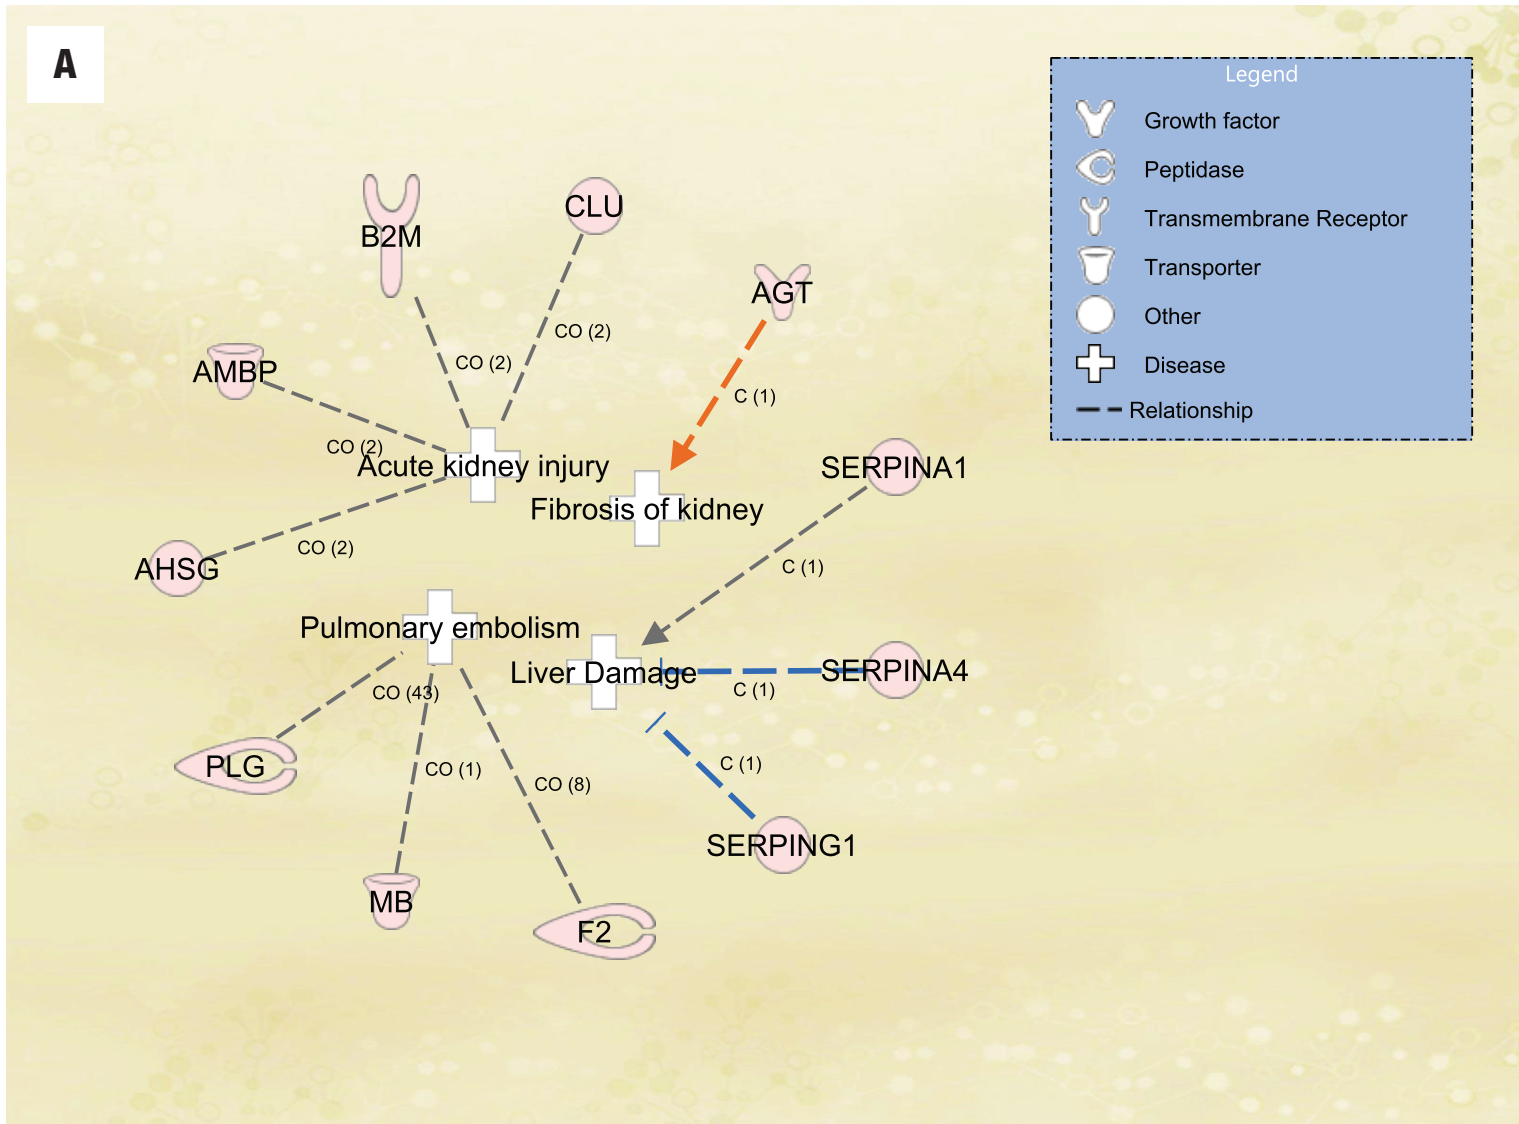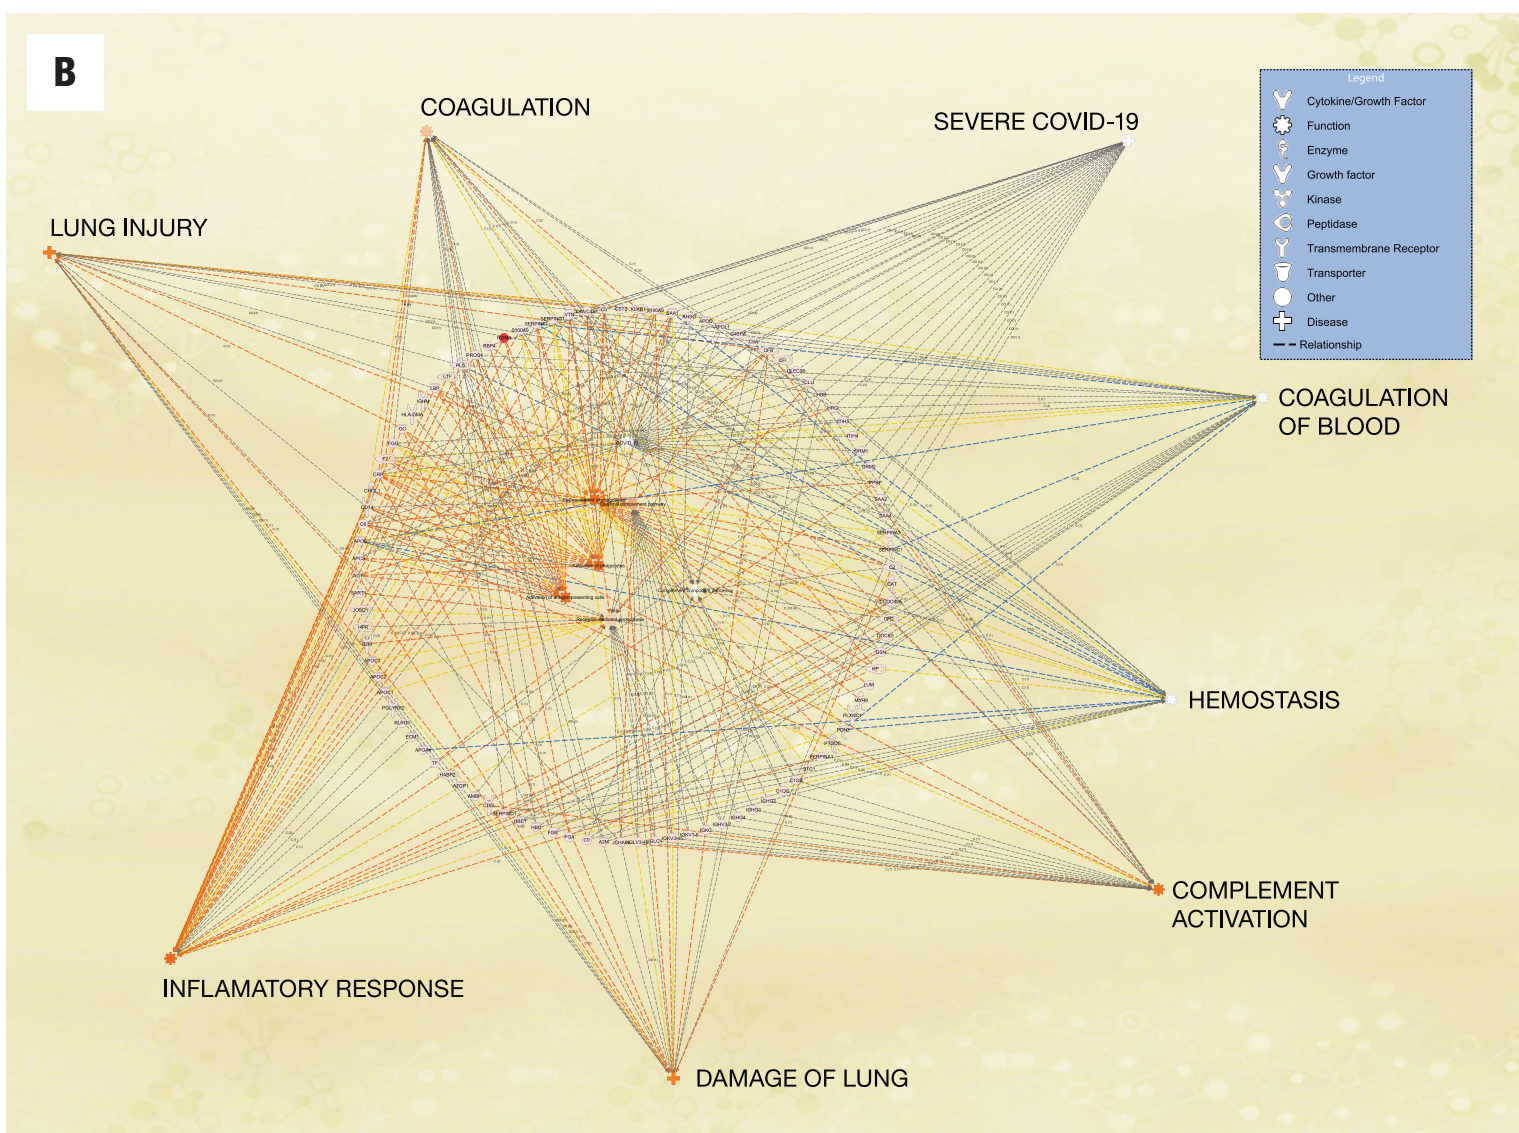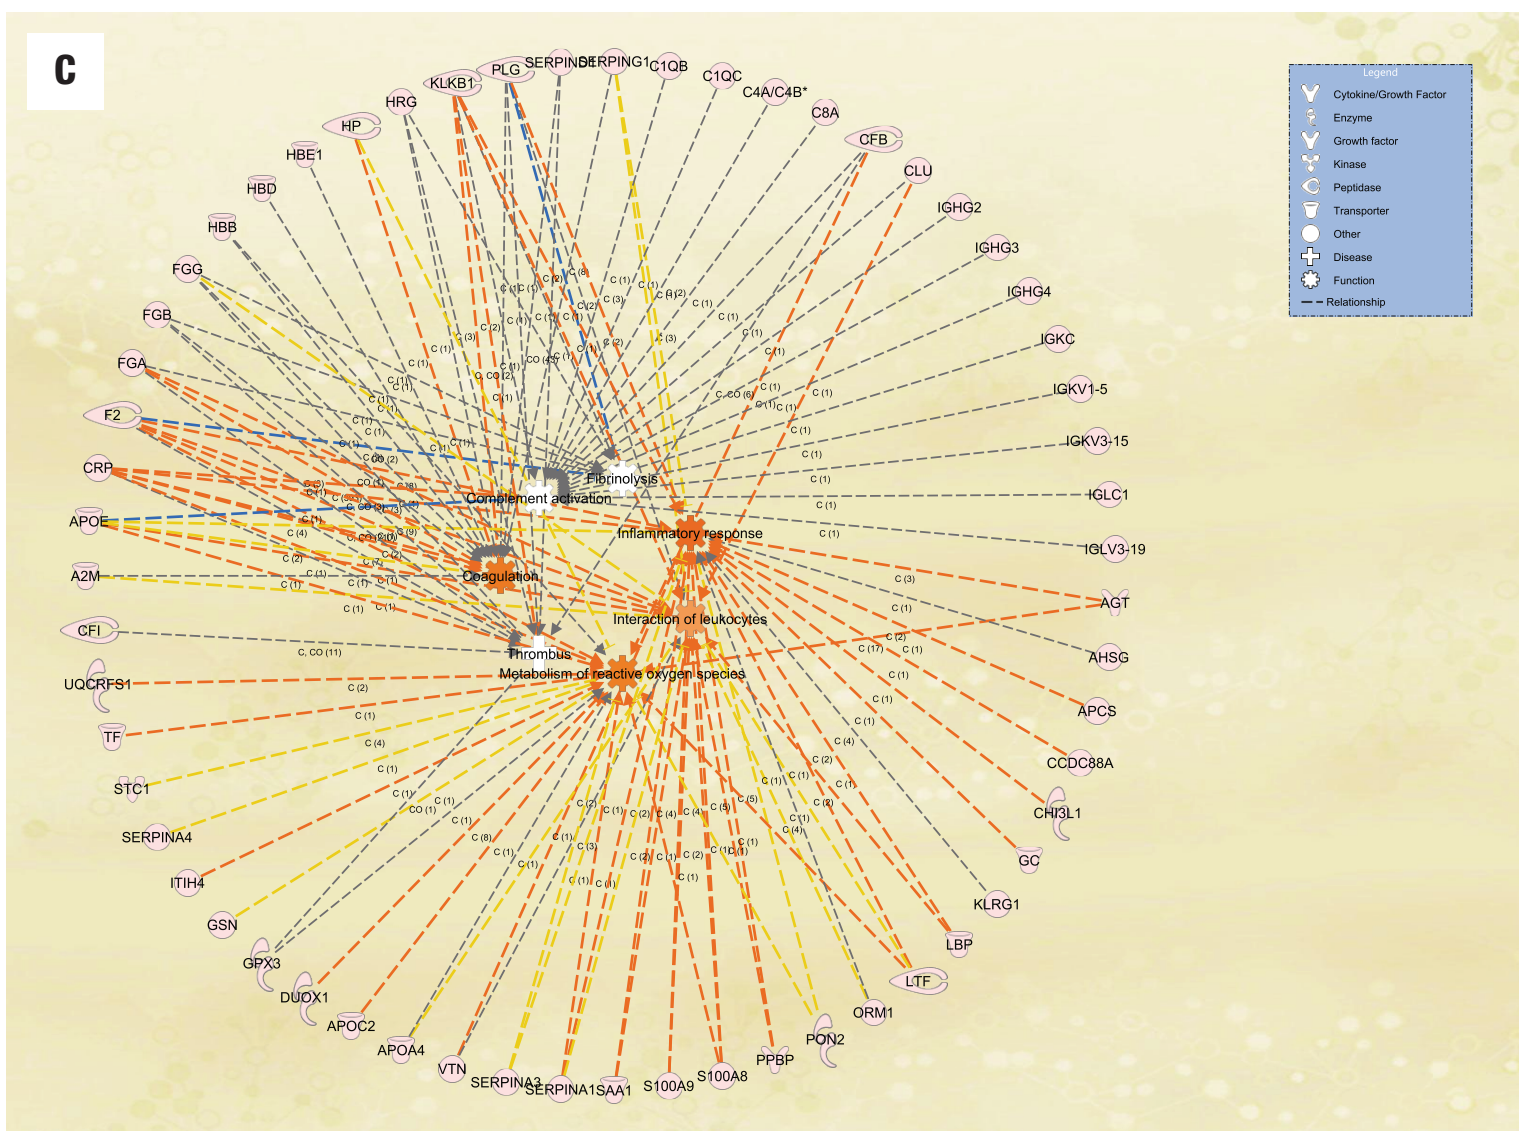



Supplementary Table S1: List of the 193 differentially expressed proteins between samples from five different grades of COVID-19 patients. (Highlighted in bold are some of the proteins that were previously identified by Messner et al. (12)).

**Supplementary Table S1 List of the 193 differentially expressed proteins between samples from five different grades of COVID-19 patients**

| Accession | Gene Name | Peptide count | Unique peptides | Confidence score | Anova (p) | q-Value | Max fold change | Power | Highest mean condition | Lowest mean condition | Description                                                   |
|-----------|-----------|---------------|-----------------|------------------|-----------|---------|-----------------|-------|------------------------|-----------------------|---------------------------------------------------------------|
| Q12805    | EFEMP1    | 1             | 1               | 5.86             | 1.3E-06   | 4.4E-06 | Infinity        | 1     | CVD19-SEVERE-D         | CVD19-ASYMPT          | EGF-containing fibulin-like extracellular matrix protein 1    |
| Q96B86    | RGMA      | 2             | 1               | 11.12            | 3.1E-07   | 1.9E-06 | Infinity        | 1     | CVD19-MODERATE         | CVD19-MILD            | Repulsive guidance molecule A                                 |
| Q9Y2R4    | DDX52     | 2             | 1               | 12.44            | 5.0E-05   | 8.5E-05 | Infinity        | 1     | CVD19-SEVERE-D         | CVD19-ASYMPT          | Probable ATP-dependent RNA helicase DDX52                     |
| Q9NVI1    | FANCI     | 2             | 1               | 11.75            | 1.7E-06   | 5.6E-06 | Infinity        | 1     | CVD19-SEVERE-D         | CVD19-ASYMPT          | Fanconi anemia group I protein                                |
| Q8IYE0    | CCDC146   | 4             | 1               | 24.84            | 1.4E-11   | 2.1E-09 | Infinity        | 1     | CVD19-SEVERE-R         | CVD19-ASYMPT          | Coiled-coil domain-containing protein 146                     |
| P17027    | ZNF23     | 2             | 2               | 11.17            | 2.4E-14   | 7.2E-12 | Infinity        | 1     | CVD19-MODERATE         | CVD19-MILD            | Zinc finger protein 23                                        |
| A4FU28    | CTAGE9    | 3             | 1               | 18.20            | 5.5E-07   | 2.3E-06 | Infinity        | 1     | CVD19-SEVERE-R         | CVD19-MILD            | cTAGE family member 9                                         |
| Q7L014    | DDX46     | 2             | 1               | 17.33            | 1.6E-08   | 3.4E-07 | 2403.18         | 1     | CVD19-SEVERE-R         | CVD19-MILD            | Probable ATP-dependent RNA helicase DDX46                     |
| Q13188    | STK3      | 2             | 1               | 20.30            | 1.7E-09   | 7.8E-08 | 1519.60         | 1     | CVD19-ASYMPT           | CVD19-MILD            | Serine/threonine-protein kinase 3                             |
| Q09MP3    | RAD51AP2  | 3             | 2               | 31.38            | 1.8E-09   | 7.8E-08 | 438.21          | 1     | CVD19-ASYMPT           | CVD19-MILD            | RAD51-associated protein 2                                    |
| Q9H6A0    | DENND2D   | 1             | 1               | 12.83            | 7.6E-08   | 9.1E-07 | 183.82          | 1     | CVD19-MODERATE         | CVD19-MILD            | DENN domain-containing protein 2D                             |
| Q96CA5    | BIRC7     | 2             | 1               | 19.79            | 9.2E-08   | 1.0E-06 | 116.77          | 1     | CVD19-ASYMPT           | CVD19-MILD            | Baculoviral IAP repeat-containing protein 7                   |
| Q02809    | PLOD1     | 6             | 5               | 39.34            | 1.1E-05   | 2.3E-05 | 109.86          | 1     | CVD19-ASYMPT           | CVD19-SEVERE-D        | Procollagen-lysine <sub>2</sub> -oxoglutarate 5-dioxygenase 1 |
| P52823    | STC1      | 2             | 1               | 17.73            | 3.8E-05   | 6.7E-05 | 106.13          | 1     | CVD19-ASYMPT           | CVD19-MILD            | Stanniocalcin-1                                               |
| P18065    | IGFBP2    | 2             | 2               | 16.06            | 9.3E-05   | 1.5E-04 | 86.96           | 1     | CVD19-SEVERE-D         | CVD19-ASYMPT          | Insulin-like growth factor-binding protein 2                  |

|        |            |    |   |        |         |         |       |   |                |                |                                                              |
|--------|------------|----|---|--------|---------|---------|-------|---|----------------|----------------|--------------------------------------------------------------|
| Q9NYA4 | MTMR4      | 2  | 1 | 11.43  | 4.4E-05 | 7.5E-05 | 79.75 | 1 | CVD19-SEVERE-D | CVD19-MODERATE | Myotubularin-related protein 4                               |
| O75037 | KIF21B     | 3  | 1 | 30.68  | 3.9E-07 | 2.0E-06 | 79.07 | 1 | CVD19-ASYMPT   | CVD19-SEVERE-D | Kinesin-like protein KIF21B                                  |
| P22557 | ALAS2      | 2  | 1 | 12.38  | 3.6E-06 | 9.9E-06 | 71.08 | 1 | CVD19-SEVERE-D | CVD19-ASYMPT   | 5-aminolevulinate synthase_ erythroid-specific_mitochondrial |
| P12036 | NEFH       | 3  | 2 | 17.01  | 8.7E-06 | 1.9E-05 | 64.58 | 1 | CVD19-ASYMPT   | CVD19-SEVERE-D | Neurofilament heavy polypeptide                              |
| P80723 | BASP1      | 3  | 3 | 27.95  | 1.5E-08 | 3.4E-07 | 64.46 | 1 | CVD19-MILD     | CVD19-SEVERE-R | Brain acid soluble protein 1                                 |
| P32119 | PRDX2      | 11 | 9 | 102.95 | 2.2E-07 | 1.6E-06 | 59.40 | 1 | CVD19-ASYMPT   | CVD19-SEVERE-D | Peroxiredoxin-2                                              |
| P02144 | MB         | 4  | 4 | 33.29  | 2.5E-07 | 1.7E-06 | 50.75 | 1 | CVD19-SEVERE-D | CVD19-ASYMPT   | Myoglobin                                                    |
| P28161 | GSTM2      | 2  | 1 | 12.98  | 2.6E-08 | 4.0E-07 | 48.47 | 1 | CVD19-ASYMPT   | CVD19-SEVERE-D | Glutathione S-transferase Mu 2                               |
| P01602 | IGKV1-5    | 3  | 1 | 29.18  | 9.2E-07 | 3.5E-06 | 47.94 | 1 | CVD19-SEVERE-R | CVD19-ASYMPT   | Immunoglobulin kappa variable 1-5                            |
| P22352 | GPX3       | 5  | 3 | 39.26  | 2.0E-05 | 3.9E-05 | 46.49 | 1 | CVD19-SEVERE-D | CVD19-ASYMPT   | Glutathione peroxidase 3                                     |
| Q8N8H1 | ZNF321P    | 1  | 1 | 11.22  | 1.9E-08 | 3.8E-07 | 44.00 | 1 | CVD19-SEVERE-D | CVD19-SEVERE-R | Putative protein ZNF321                                      |
| Q4G0X9 | CCDC40     | 4  | 3 | 29.33  | 1.0E-07 | 1.1E-06 | 43.74 | 1 | CVD19-SEVERE-R | CVD19-SEVERE-D | Coiled-coil domain-containing protein 40                     |
| Q3V6T2 | CCDC88A    | 4  | 3 | 22.00  | 2.8E-06 | 8.1E-06 | 42.81 | 1 | CVD19-SEVERE-D | CVD19-ASYMPT   | Girdin                                                       |
| P02741 | <b>CRP</b> | 4  | 4 | 53.43  | 4.6E-06 | 1.1E-05 | 35.33 | 1 | CVD19-SEVERE-D | CVD19-ASYMPT   | C-reactive protein                                           |
| P02788 | LTF        | 5  | 4 | 30.44  | 9.6E-07 | 3.5E-06 | 32.70 | 1 | CVD19-MILD     | CVD19-SEVERE-R | Lactotransferrin                                             |
| Q9BX63 | BRIP1      | 4  | 3 | 30.19  | 4.8E-07 | 2.2E-06 | 32.43 | 1 | CVD19-ASYMPT   | CVD19-SEVERE-D | Fanconi anemia group J protein                               |
| Q9Y3B9 | RRP15      | 1  | 1 | 10.07  | 4.6E-06 | 1.1E-05 | 30.22 | 1 | CVD19-SEVERE-D | CVD19-ASYMPT   | RRP15-like protein                                           |
| P61925 | PK1A       | 1  | 1 | 6.38   | 4.6E-06 | 1.1E-05 | 28.19 | 1 | CVD19-SEVERE-D | CVD19-MODERATE | cAMP-dependent protein kinase inhibitor alpha                |
| P10501 |            | 1  | 1 | 13.48  | 1.5E-05 | 3.1E-05 | 28.11 | 1 | CVD19-SEVERE-D | CVD19-MODERATE | Outer capsid glycoprotein VP7                                |

|        |             |    |    |        |         |         |       |   |                |                |                                                                      |
|--------|-------------|----|----|--------|---------|---------|-------|---|----------------|----------------|----------------------------------------------------------------------|
| Q8IXQ9 | ETFBKMT     | 2  | 1  | 14.65  | 5.5E-06 | 1.3E-05 | 28.01 | 1 | CVD19-ASYMPT   | CVD19-SEVERE-D | Electron transfer flavoprotein beta subunit lysine methyltransferase |
| P02100 | HBE1        | 3  | 1  | 21.63  | 4.4E-07 | 2.1E-06 | 27.29 | 1 | CVD19-SEVERE-R | CVD19-SEVERE-D | Hemoglobin subunit epsilon                                           |
| P0DJI9 | <b>SAA2</b> | 10 | 3  | 143.11 | 2.5E-07 | 1.7E-06 | 27.24 | 1 | CVD19-SEVERE-D | CVD19-MODERATE | Serum amyloid A-2 protein                                            |
| P36222 | CH3L1       | 6  | 6  | 32.79  | 6.9E-06 | 1.6E-05 | 26.00 | 1 | CVD19-ASYMPT   | CVD19-MILD     | Chitinase-3-like protein 1                                           |
| P02679 | <b>FGG</b>  | 15 | 15 | 170.01 | 2.1E-07 | 1.5E-06 | 25.38 | 1 | CVD19-MILD     | CVD19-SEVERE-R | Fibrinogen gamma chain                                               |
| P60709 | <b>ACTB</b> | 4  | 2  | 30.97  | 3.0E-07 | 1.9E-06 | 24.81 | 1 | CVD19-SEVERE-D | CVD19-MILD     | Actin_cytoplasmic 1                                                  |
| O00566 | MPHOSPH10   | 3  | 2  | 16.76  | 1.2E-06 | 4.3E-06 | 24.33 | 1 | CVD19-SEVERE-R | CVD19-SEVERE-D | U3 small nucleolar ribonucleoprotein protein MPP10                   |
| P0DJI8 | <b>SAA1</b> | 11 | 3  | 149.00 | 3.7E-07 | 2.0E-06 | 23.58 | 1 | CVD19-SEVERE-D | CVD19-MILD     | Serum amyloid A-1 protein                                            |
| P06790 | E2          | 2  | 2  | 18.79  | 2.2E-06 | 6.9E-06 | 22.37 | 1 | CVD19-ASYMPT   | CVD19-SEVERE-D | Regulatory protein E2                                                |
| P61769 | B2M         | 2  | 2  | 13.15  | 3.5E-07 | 1.9E-06 | 21.77 | 1 | CVD19-SEVERE-D | CVD19-ASYMPT   | Beta-2-microglobulin                                                 |
| Q9C091 | GREB1L      | 4  | 2  | 24.77  | 4.0E-06 | 1.0E-05 | 20.61 | 1 | CVD19-SEVERE-R | CVD19-MILD     | GREB1-like protein                                                   |
| P48751 | SLC4A3      | 2  | 1  | 12.73  | 4.7E-07 | 2.2E-06 | 20.42 | 1 | CVD19-MODERATE | CVD19-MILD     | Anion exchange protein 3                                             |
| Q9BXI3 | NT5C1A      | 2  | 2  | 20.06  | 5.4E-07 | 2.3E-06 | 20.36 | 1 | CVD19-SEVERE-R | CVD19-MILD     | Cytosolic 5'-nucleotidase 1A                                         |
| O43719 | HTATSF1     | 8  | 6  | 51.23  | 3.1E-05 | 5.6E-05 | 19.49 | 1 | CVD19-MILD     | CVD19-SEVERE-R | HIV Tat-specific factor 1                                            |
| P00915 | CA1         | 4  | 4  | 30.80  | 4.1E-05 | 7.1E-05 | 17.90 | 1 | CVD19-ASYMPT   | CVD19-MILD     | Carbonic anhydrase 1                                                 |
| P02746 | C1QB        | 1  | 1  | 10.64  | 7.1E-05 | 1.1E-04 | 17.63 | 1 | CVD19-MILD     | CVD19-ASYMPT   | Complement C1q subcomponent subunit B                                |
| Q10587 | TEF         | 1  | 1  | 6.30   | 1.0E-05 | 2.1E-05 | 17.52 | 1 | CVD19-SEVERE-R | CVD19-MILD     | Thyrotroph embryonic factor                                          |
| Q96L93 | KIF16B      | 8  | 7  | 69.24  | 1.4E-07 | 1.3E-06 | 16.95 | 1 | CVD19-ASYMPT   | CVD19-SEVERE-D | Kinesin-like protein KIF16B                                          |
| Q6P587 | FAHD1       | 1  | 1  | 6.27   | 3.3E-07 | 1.9E-06 | 16.74 | 1 | CVD19-         | CVD19-         | Acylpyruvase FAHD1_                                                  |

|            |                  |    |    |        |         |         |       |   |                |                |                                                         |
|------------|------------------|----|----|--------|---------|---------|-------|---|----------------|----------------|---------------------------------------------------------|
|            |                  |    |    |        |         |         |       |   | SEVERE-D       | ASYMPT         | mitochondrial                                           |
| Q15020     | SART3            | 3  | 2  | 25.60  | 9.3E-07 | 3.5E-06 | 16.74 | 1 | CVD19-SEVERE-D | CVD19-ASYMPT   | Squamous cell carcinoma antigen recognized by T-cells 3 |
| P69891     | HBG1             | 6  | 5  | 38.24  | 1.8E-06 | 5.7E-06 | 16.69 | 1 | CVD19-MODERATE | CVD19-SEVERE-D | Hemoglobin subunit gamma-1                              |
| Q96E93     | KLRG1            | 1  | 1  | 5.82   | 3.7E-05 | 6.6E-05 | 16.27 | 1 | CVD19-SEVERE-D | CVD19-ASYMPT   | Killer cell lectin-like receptor subfamily G member 1   |
| Q96NH3     | TBC1D32          | 4  | 2  | 31.25  | 2.9E-07 | 1.8E-06 | 16.26 | 1 | CVD19-SEVERE-D | CVD19-ASYMPT   | Protein broad-minded                                    |
| Q02952     | AKAP12           | 5  | 3  | 31.88  | 4.2E-05 | 7.2E-05 | 15.29 | 1 | CVD19-SEVERE-D | CVD19-ASYMPT   | A-kinase anchor protein 12                              |
| P20742     | PZP              | 25 | 13 | 249.95 | 2.3E-09 | 8.8E-08 | 15.01 | 1 | CVD19-ASYMPT   | CVD19-MILD     | Pregnancy zone protein                                  |
| Q9HB71     | CACYBP           | 2  | 1  | 24.36  | 2.3E-05 | 4.4E-05 | 14.84 | 1 | CVD19-SEVERE-D | CVD19-MODERATE | Calcyclin-binding protein                               |
| P04004     | VTN              | 15 | 13 | 136.56 | 2.4E-06 | 7.0E-06 | 14.45 | 1 | CVD19-SEVERE-D | CVD19-ASYMPT   | Vitronectin                                             |
| P02763     | ORM1             | 15 | 12 | 181.21 | 3.1E-10 | 3.1E-08 | 13.33 | 1 | CVD19-SEVERE-D | CVD19-ASYMPT   | Alpha-1-acid glycoprotein 1                             |
| P01011     | SERPINA3         | 33 | 32 | 321.95 | 2.0E-07 | 1.5E-06 | 13.16 | 1 | CVD19-SEVERE-D | CVD19-ASYMPT   | Alpha-1-antichymotrypsin                                |
| P36980     | CFHR2            | 6  | 2  | 65.21  | 8.2E-06 | 1.8E-05 | 12.98 | 1 | CVD19-MODERATE | CVD19-MILD     | Complement factor H-related protein 2                   |
| P01861     | IGHG4            | 13 | 7  | 143.11 | 1.3E-08 | 3.4E-07 | 12.85 | 1 | CVD19-MILD     | CVD19-SEVERE-R | Immunoglobulin heavy constant gamma 4                   |
| P02743     | APCS             | 2  | 2  | 14.56  | 6.9E-08 | 8.7E-07 | 12.83 | 1 | CVD19-SEVERE-D | CVD19-ASYMPT   | Serum amyloid P-component                               |
| A0A0C4DH68 | DH68<br>IGKV2-24 | 3  | 1  | 20.53  | 8.4E-05 | 1.3E-04 | 12.46 | 1 | CVD19-SEVERE-D | CVD19-MODERATE | Immunoglobulin kappa variable 2-24                      |
| Q15165     | PON2             | 2  | 2  | 10.26  | 6.6E-09 | 2.0E-07 | 12.28 | 1 | CVD19-MODERATE | CVD19-SEVERE-D | Serum paraoxonase/arylesterase 2                        |
| P02675     | <b>FGB</b>       | 26 | 26 | 284.37 | 4.2E-07 | 2.0E-06 | 12.14 | 1 | CVD19-MILD     | CVD19-ASYMPT   | Fibrinogen beta chain                                   |
| Q96KF7     | SMIM8            | 1  | 1  | 11.93  | 4.0E-07 | 2.0E-06 | 12.11 | 1 | CVD19-ASYMPT   | CVD19-MILD     | Small integral membrane protein 8                       |
| P06702     | S100A9           | 4  | 4  | 43.09  | 2.3E-06 | 6.9E-06 | 11.51 | 1 | CVD19-         | CVD19-         | Protein S100-A9                                         |

|        |              |    |    |        |         |         |       |   |                |                |                                                   |
|--------|--------------|----|----|--------|---------|---------|-------|---|----------------|----------------|---------------------------------------------------|
|        |              |    |    |        |         |         |       |   | SEVERE-D       | SEVERE-R       |                                                   |
| P02671 | FGA          | 22 | 22 | 202.85 | 2.3E-06 | 6.9E-06 | 11.50 | 1 | CVD19-MILD     | CVD19-MODERATE | Fibrinogen alpha chain                            |
| P19652 | ORM2         | 13 | 10 | 177.33 | 2.1E-08 | 3.9E-07 | 11.24 | 1 | CVD19-SEVERE-D | CVD19-ASYMPT   | Alpha-1-acid glycoprotein 2                       |
| P02750 | <b>LRG1</b>  | 13 | 13 | 134.36 | 2.6E-06 | 7.4E-06 | 11.20 | 1 | CVD19-SEVERE-D | CVD19-ASYMPT   | Leucine-rich alpha-2-glycoprotein                 |
| Q9HAW4 | CLSPN        | 2  | 1  | 16.94  | 5.1E-06 | 1.2E-05 | 10.91 | 1 | CVD19-SEVERE-D | CVD19-ASYMPT   | Claspin                                           |
| P00739 | HPR          | 28 | 13 | 264.49 | 9.7E-06 | 2.1E-05 | 10.83 | 1 | CVD19-MILD     | CVD19-SEVERE-R | Haptoglobin-related protein                       |
| P69905 | HBA1         | 31 | 28 | 309.33 | 4.1E-07 | 2.0E-06 | 10.71 | 1 | CVD19-MILD     | CVD19-SEVERE-D | Hemoglobin subunit alpha                          |
| P02654 | <b>APOC1</b> | 3  | 3  | 49.07  | 2.7E-07 | 1.8E-06 | 10.68 | 1 | CVD19-SEVERE-D | CVD19-MILD     | Apolipoprotein C-I                                |
| Q86UX2 | ITIH5        | 2  | 1  | 12.22  | 1.2E-06 | 4.1E-06 | 10.38 | 1 | CVD19-ASYMPT   | CVD19-SEVERE-D | Inter-alpha-trypsin inhibitor heavy chain H5      |
| P08185 | SERPINA6     | 5  | 5  | 36.85  | 1.0E-05 | 2.1E-05 | 10.32 | 1 | CVD19-SEVERE-D | CVD19-ASYMPT   | Corticosteroid-binding globulin                   |
| Q9UGL9 | CRCT1        | 1  | 1  | 13.12  | 4.4E-08 | 5.8E-07 | 10.32 | 1 | CVD19-ASYMPT   | CVD19-MILD     | Cysteine-rich C-terminal protein 1                |
| P05155 | SERPING1     | 18 | 16 | 174.03 | 1.4E-07 | 1.3E-06 | 10.25 | 1 | CVD19-SEVERE-D | CVD19-ASYMPT   | Plasma protease C1 inhibitor                      |
| P29622 | SERPINA4     | 4  | 4  | 24.25  | 3.8E-05 | 6.7E-05 | 10.22 | 1 | CVD19-MILD     | CVD19-MODERATE | Kallistatin                                       |
| O14972 | VPS26C       | 3  | 2  | 16.73  | 3.1E-06 | 8.7E-06 | 10.20 | 1 | CVD19-SEVERE-R | CVD19-MILD     | Vacuolar protein sorting-associated protein 26C   |
| Q07912 | TNK2         | 3  | 1  | 19.17  | 6.5E-07 | 2.7E-06 | 10.12 | 1 | CVD19-SEVERE-D | CVD19-ASYMPT   | Activated CDC42 kinase 1                          |
| P00738 | <b>HP</b>    | 47 | 30 | 495.49 | 5.8E-09 | 1.9E-07 | 10.00 | 1 | CVD19-SEVERE-D | CVD19-ASYMPT   | Haptoglobin                                       |
| Q12852 | MAP3K12      | 2  | 1  | 18.79  | 1.0E-05 | 2.1E-05 | 9.92  | 1 | CVD19-ASYMPT   | CVD19-SEVERE-D | Mitogen-activated protein kinase kinase kinase 12 |
| O15068 | MCF2L        | 4  | 2  | 26.69  | 2.0E-05 | 3.8E-05 | 9.79  | 1 | CVD19-MILD     | CVD19-SEVERE-R | Guanine nucleotide exchange factor DBS            |
| P55081 | MFAP1        | 2  | 1  | 16.06  | 1.3E-07 | 1.2E-06 | 9.39  | 1 | CVD19-SEVERE-D | CVD19-ASYMPT   | Microfibrillar-associated protein 1               |
| P01009 | SERPINA1     | 52 | 51 | 575.19 | 5.0E-07 | 2.2E-06 | 9.31  | 1 | CVD19-         | CVD19-         | Alpha-1-antitrypsin                               |

|        |                  |    |    |        |         |         |      |   |                |                |                                              |
|--------|------------------|----|----|--------|---------|---------|------|---|----------------|----------------|----------------------------------------------|
|        |                  |    |    |        |         |         |      |   | SEVERE-D       | ASYMPT         |                                              |
| Q14624 | <b>ITIH4</b>     | 30 | 29 | 280.90 | 4.3E-06 | 1.1E-05 | 9.31 | 1 | CVD19-MILD     | CVD19-SEVERE-R | Inter-alpha-trypsin inhibitor heavy chain H4 |
| P25311 | AZGP1            | 22 | 21 | 219.22 | 2.6E-08 | 4.0E-07 | 9.28 | 1 | CVD19-SEVERE-D | CVD19-ASYMPT   | Zinc-alpha-2-glycoprotein                    |
| P01859 | IGHG2            | 15 | 6  | 197.97 | 1.2E-08 | 3.3E-07 | 9.24 | 1 | CVD19-MILD     | CVD19-MODERATE | Immunoglobulin heavy constant gamma 2        |
| P18428 | <b>LBP</b>       | 6  | 6  | 52.84  | 5.8E-05 | 9.6E-05 | 9.09 | 1 | CVD19-SEVERE-D | CVD19-SEVERE-R | Lipopolysaccharide-binding protein           |
| P01876 | IGHA1            | 28 | 18 | 300.87 | 3.8E-08 | 5.2E-07 | 9.07 | 1 | CVD19-SEVERE-D | CVD19-ASYMPT   | Immunoglobulin heavy constant alpha 1        |
| Q06033 | ITIH3            | 6  | 5  | 51.45  | 6.9E-07 | 2.8E-06 | 8.91 | 1 | CVD19-SEVERE-D | CVD19-MILD     | Inter-alpha-trypsin inhibitor heavy chain H3 |
| P01019 | AGT              | 11 | 11 | 99.94  | 3.2E-07 | 1.9E-06 | 8.66 | 1 | CVD19-SEVERE-D | CVD19-MODERATE | Angiotensinogen                              |
| Q8IYD8 | FANCM            | 6  | 4  | 27.88  | 2.6E-08 | 4.0E-07 | 8.66 | 1 | CVD19-SEVERE-R | CVD19-MILD     | Fanconi anemia group M protein               |
| P19113 | HDC              | 2  | 1  | 16.01  | 1.8E-05 | 3.5E-05 | 8.60 | 1 | CVD19-SEVERE-D | CVD19-SEVERE-R | Histidine decarboxylase                      |
| P35542 | SAA4             | 6  | 6  | 54.09  | 4.0E-05 | 7.0E-05 | 8.45 | 1 | CVD19-MILD     | CVD19-SEVERE-R | Serum amyloid A-4 protein                    |
| P04196 | HRG              | 18 | 18 | 155.02 | 7.0E-07 | 2.8E-06 | 8.36 | 1 | CVD19-ASYMPT   | CVD19-SEVERE-R | Histidine-rich glycoprotein                  |
| Q9UPU3 | SORCS3           | 6  | 5  | 33.30  | 3.9E-06 | 1.0E-05 | 8.11 | 1 | CVD19-ASYMPT   | CVD19-SEVERE-D | VPS10 domain-containing receptor SorCS3      |
| P07357 | <b>C8A</b>       | 3  | 3  | 21.61  | 2.3E-05 | 4.3E-05 | 8.10 | 1 | CVD19-SEVERE-R | CVD19-MILD     | Complement component C8 alpha chain          |
| P00450 | CP               | 42 | 41 | 426.33 | 1.3E-09 | 7.8E-08 | 7.93 | 1 | CVD19-SEVERE-D | CVD19-ASYMPT   | Ceruloplasmin                                |
| O60486 | PLXNC1           | 5  | 4  | 28.60  | 3.7E-06 | 1.0E-05 | 7.84 | 1 | CVD19-MODERATE | CVD19-MILD     | Plexin-C1                                    |
| P59666 | DEFA3            | 2  | 2  | 11.31  | 5.2E-06 | 1.2E-05 | 7.81 | 1 | CVD19-SEVERE-D | CVD19-SEVERE-R | Neutrophil defensin 3                        |
| A4UHQ7 | L - RNA-directed | 4  | 3  | 22.85  | 5.7E-07 | 2.4E-06 | 7.79 | 1 | CVD19-MILD     | CVD19-SEVERE-D | RNA-directed RNA polymerase L                |
| Q9NUZ1 | ACOXL            | 4  | 3  | 22.40  | 4.0E-06 | 1.0E-05 | 7.51 | 1 | CVD19-SEVERE-D | CVD19-ASYMPT   | Acyl-coenzyme A oxidase-like protein         |
| P07360 | C8G              | 5  | 4  | 28.66  | 1.6E-05 | 3.3E-05 | 7.04 | 1 | CVD19-         | CVD19-         | Complement component                         |

|        |            |     |     |         |         |         |      |   |                |                |                                                      |
|--------|------------|-----|-----|---------|---------|---------|------|---|----------------|----------------|------------------------------------------------------|
|        |            |     |     |         |         |         |      |   | SEVERE-D       | ASYMPT         | C8 gamma chain                                       |
| A5A3E0 | POTEF      | 6   | 2   | 36.42   | 5.1E-07 | 2.3E-06 | 6.92 | 1 | CVD19-SEVERE-D | CVD19-ASYMPT   | POTE ankyrin domain family member F                  |
| P0C0L5 | C4B        | 77  | 3   | 921.48  | 8.9E-07 | 3.4E-06 | 6.91 | 1 | CVD19-SEVERE-D | CVD19-ASYMPT   | Complement C4-B                                      |
| P0C0L4 | C4A        | 87  | 11  | 921.64  | 8.9E-07 | 3.4E-06 | 6.91 | 1 | CVD19-SEVERE-D | CVD19-ASYMPT   | Complement C4-A                                      |
| P02774 | GC         | 39  | 38  | 394.35  | 4.0E-06 | 1.0E-05 | 6.80 | 1 | CVD19-SEVERE-D | CVD19-ASYMPT   | Vitamin D-binding protein                            |
| P06727 | APOA4      | 26  | 23  | 288.84  | 1.1E-07 | 1.1E-06 | 6.60 | 1 | CVD19-SEVERE-D | CVD19-MODERATE | Apolipoprotein A-IV                                  |
| Q9P2P5 | HECW2      | 3   | 1   | 20.35   | 1.1E-09 | 7.8E-08 | 6.58 | 1 | CVD19-ASYMPT   | CVD19-SEVERE-D | E3 ubiquitin-protein ligase HECW2                    |
| P02656 | APOC3      | 6   | 6   | 55.51   | 1.1E-06 | 3.9E-06 | 6.53 | 1 | CVD19-SEVERE-D | CVD19-ASYMPT   | Apolipoprotein C-III                                 |
| P02768 | <b>ALB</b> | 167 | 159 | 1276.86 | 8.3E-08 | 9.4E-07 | 6.49 | 1 | CVD19-MILD     | CVD19-SEVERE-R | Serum albumin                                        |
| P47985 | UQCRRS1    | 1   | 1   | 12.96   | 2.5E-06 | 7.3E-06 | 6.41 | 1 | CVD19-ASYMPT   | CVD19-SEVERE-D | Cytochrome b-c1 complex subunit Rieske_mitochondrial |
| P02787 | <b>TF</b>  | 100 | 95  | 1031.64 | 7.8E-08 | 9.1E-07 | 6.28 | 1 | CVD19-MILD     | CVD19-SEVERE-R | Serotransferrin                                      |
| Q9NRD9 | DUOX1      | 4   | 3   | 29.42   | 9.2E-06 | 2.0E-05 | 6.18 | 1 | CVD19-ASYMPT   | CVD19-MILD     | Dual oxidase 1                                       |
| P68871 | HBB        | 44  | 35  | 363.70  | 3.2E-07 | 1.9E-06 | 6.11 | 1 | CVD19-MILD     | CVD19-SEVERE-D | Hemoglobin subunit beta                              |
| P02042 | HBD        | 14  | 6   | 199.75  | 3.7E-06 | 9.9E-06 | 5.98 | 1 | CVD19-MILD     | CVD19-SEVERE-D | Hemoglobin subunit delta                             |
| Q8N3J2 | METTL4     | 2   | 2   | 17.26   | 2.9E-07 | 1.8E-06 | 5.68 | 1 | CVD19-SEVERE-D | CVD19-MILD     | Methyltransferase-like protein 4                     |
| P04003 | C4BPA      | 22  | 20  | 191.24  | 3.2E-06 | 8.8E-06 | 5.64 | 1 | CVD19-ASYMPT   | CVD19-SEVERE-R | C4b-binding protein alpha chain                      |
| P05090 | APOD       | 8   | 8   | 65.36   | 2.2E-06 | 6.7E-06 | 5.57 | 1 | CVD19-SEVERE-D | CVD19-ASYMPT   | Apolipoprotein D                                     |
| Q9BYX2 | TBC1D2     | 3   | 2   | 19.54   | 9.2E-06 | 2.0E-05 | 5.57 | 1 | CVD19-SEVERE-D | CVD19-ASYMPT   | TBC1 domain family member 2A                         |
| P0DOY2 | IGLC2      | 6   | 1   | 104.70  | 1.5E-07 | 1.3E-06 | 5.56 | 1 | CVD19-SEVERE-D | CVD19-ASYMPT   | Immunoglobulin lambda constant 2                     |
| P0CF74 | IGLC6      | 7   | 1   | 86.28   | 1.5E-07 | 1.3E-06 | 5.56 | 1 | CVD19-         | CVD19-         | Immunoglobulin lambda                                |



|            |           |     |     |         |         |         |      |   |                |                |                                                                                                 |
|------------|-----------|-----|-----|---------|---------|---------|------|---|----------------|----------------|-------------------------------------------------------------------------------------------------|
|            |           |     |     |         |         |         |      |   | SEVERE-D       | ASYMPT         | constant 6                                                                                      |
| P01024     | C3        | 125 | 118 | 1349.65 | 1.1E-06 | 3.8E-06 | 5.52 | 1 | CVD19-MILD     | CVD19-SEVERE-R | Complement C3                                                                                   |
| P19823     | ITIH2     | 20  | 19  | 214.81  | 1.7E-06 | 5.5E-06 | 5.52 | 1 | CVD19-MILD     | CVD19-ASYMPT   | Inter-alpha-trypsin inhibitor heavy chain H2                                                    |
| Q66GS9     | CEP135    | 9   | 7   | 57.99   | 4.8E-06 | 1.2E-05 | 5.34 | 1 | CVD19-SEVERE-R | CVD19-MILD     | Centrosomal protein of 135 kDa                                                                  |
| Q9UHR6     | ZNHIT2    | 4   | 4   | 23.71   | 2.2E-05 | 4.1E-05 | 5.27 | 1 | CVD19-SEVERE-D | CVD19-ASYMPT   | Zinc finger HIT domain-containing protein 2                                                     |
| P01860     | IGHG3     | 15  | 6   | 208.91  | 8.2E-07 | 3.2E-06 | 5.16 | 1 | CVD19-SEVERE-D | CVD19-ASYMPT   | Immunoglobulin heavy constant gamma 3                                                           |
| P80748     | IGLV3-21  | 3   | 3   | 21.17   | 2.1E-05 | 3.9E-05 | 5.04 | 1 | CVD19-SEVERE-D | CVD19-MODERATE | Immunoglobulin lambda variable 3-21                                                             |
| P01591     | JCHAIN    | 9   | 9   | 72.14   | 8.8E-07 | 3.4E-06 | 4.98 | 1 | CVD19-SEVERE-D | CVD19-ASYMPT   | Immunoglobulin J chain                                                                          |
| P49917     | LIG4      | 5   | 3   | 27.24   | 1.3E-06 | 4.4E-06 | 4.97 | 1 | CVD19-SEVERE-R | CVD19-MILD     | DNA ligase 4                                                                                    |
| Q15040     | JOSD1     | 1   | 1   | 6.43    | 2.4E-07 | 1.7E-06 | 4.97 | 1 | CVD19-SEVERE-D | CVD19-ASYMPT   | Josephin-1                                                                                      |
| Q13588     | GRAP      | 2   | 1   | 11.47   | 2.5E-08 | 4.0E-07 | 4.84 | 1 | CVD19-MILD     | CVD19-SEVERE-R | GRB2-related adapter protein                                                                    |
| P0DOX3     | IgG-Delta | 3   | 3   | 15.93   | 2.7E-05 | 5.1E-05 | 4.81 | 1 | CVD19-ASYMPT   | CVD19-SEVERE-D | Immunoglobulin delta heavy chain                                                                |
| Q5VU65     | NUP210L   | 6   | 5   | 40.47   | 2.1E-05 | 4.0E-05 | 4.78 | 1 | CVD19-SEVERE-D | CVD19-SEVERE-R | Nuclear pore membrane glycoprotein 210-like                                                     |
| P05546     | SERPIND1  | 11  | 11  | 94.45   | 3.9E-06 | 1.0E-05 | 4.71 | 1 | CVD19-SEVERE-D | CVD19-MILD     | Heparin cofactor 2                                                                              |
| P19827     | ITIH1     | 13  | 12  | 100.82  | 3.7E-05 | 6.6E-05 | 4.68 | 1 | CVD19-ASYMPT   | CVD19-SEVERE-D | Inter-alpha-trypsin inhibitor heavy chain H1                                                    |
| A0A0B4J1Y9 | IGHV3-72  | 2   | 2   | 14.35   | 4.0E-06 | 1.0E-05 | 4.68 | 1 | CVD19-SEVERE-D | CVD19-MODERATE | Immunoglobulin heavy variable 3-72                                                              |
| Q5K130     | CLLU1-AS1 | 1   | 1   | 13.55   | 3.3E-07 | 1.9E-06 | 4.68 | 1 | CVD19-SEVERE-D | CVD19-SEVERE-R | Putative chronic lymphocytic leukemia up-regulated protein 1 opposite strand transcript protein |
| P00734     | F2        | 26  | 26  | 195.44  | 1.7E-07 | 1.4E-06 | 4.64 | 1 | CVD19-MILD     | CVD19-ASYMPT   | Prothrombin                                                                                     |
| P01714     | IGLV3-19  | 1   | 1   | 6.91    | 7.6E-06 | 1.7E-05 | 4.46 | 1 | CVD19-         | CVD19-         | Immunoglobulin lambda                                                                           |

|        |           |    |    |        |         |         |      |   |                |                |                                                        |
|--------|-----------|----|----|--------|---------|---------|------|---|----------------|----------------|--------------------------------------------------------|
|        |           |    |    |        |         |         |      |   | SEVERE-D       | ASYMPT         | variable 3-19                                          |
| P03952 | KLKB1     | 12 | 11 | 79.34  | 2.1E-05 | 3.9E-05 | 4.40 | 1 | CVD19-SEVERE-R | CVD19-MODERATE | Plasma kallikrein                                      |
| P02655 | APOC2     | 4  | 4  | 46.78  | 2.4E-05 | 4.5E-05 | 4.29 | 1 | CVD19-SEVERE-D | CVD19-MODERATE | Apolipoprotein C-II                                    |
| P01619 | IGKV3-20  | 3  | 3  | 27.41  | 2.0E-05 | 3.8E-05 | 4.27 | 1 | CVD19-SEVERE-D | CVD19-SEVERE-R | Immunoglobulin kappa variable 3-20                     |
| P02790 | HPX       | 32 | 29 | 367.71 | 1.5E-06 | 5.0E-06 | 4.25 | 1 | CVD19-SEVERE-D | CVD19-ASYMPT   | Hemopexin                                              |
| P22792 | CPN2      | 7  | 6  | 52.21  | 1.2E-06 | 4.3E-06 | 4.25 | 1 | CVD19-MILD     | CVD19-MODERATE | Carboxypeptidase N subunit 2                           |
| P01834 | IGKC      | 10 | 3  | 136.90 | 5.2E-07 | 2.3E-06 | 4.22 | 1 | CVD19-SEVERE-D | CVD19-SEVERE-R | Immunoglobulin kappa constant                          |
| P0DOX5 | IgG-gamma | 28 | 17 | 306.99 | 1.7E-07 | 1.4E-06 | 4.11 | 1 | CVD19-SEVERE-D | CVD19-ASYMPT   | Immunoglobulin gamma-1 heavy chain                     |
| P02765 | AHSG      | 18 | 17 | 149.09 | 3.4E-07 | 1.9E-06 | 4.10 | 1 | CVD19-MILD     | CVD19-MODERATE | Alpha-2-HS-glycoprotein                                |
| Q93074 | MED12     | 6  | 5  | 40.97  | 5.7E-06 | 1.3E-05 | 4.09 | 1 | CVD19-ASYMPT   | CVD19-SEVERE-R | Mediator of RNA polymerase II transcription subunit 12 |
| P02775 | PPBP      | 4  | 3  | 45.53  | 1.8E-07 | 1.4E-06 | 4.05 | 1 | CVD19-SEVERE-D | CVD19-MODERATE | Platelet basic protein                                 |
| P02652 | APOA2     | 18 | 18 | 160.51 | 3.1E-08 | 4.5E-07 | 4.04 | 1 | CVD19-MILD     | CVD19-MODERATE | Apolipoprotein A-II                                    |
| P02760 | AMBP      | 16 | 15 | 183.85 | 7.6E-06 | 1.7E-05 | 4.01 | 1 | CVD19-SEVERE-D | CVD19-MODERATE | Protein AMBP                                           |
| Q9ULJ7 | ANKRD50   | 2  | 1  | 12.07  | 6.9E-06 | 1.6E-05 | 3.66 | 1 | CVD19-ASYMPT   | CVD19-SEVERE-R | Ankyrin repeat domain-containing protein 50            |
| P35749 | MYH11     | 12 | 9  | 86.99  | 3.7E-06 | 9.9E-06 | 3.51 | 1 | CVD19-SEVERE-D | CVD19-SEVERE-R | Myosin-11                                              |
| Q96PJ5 | FCRL4     | 2  | 1  | 18.91  | 1.8E-05 | 3.5E-05 | 3.47 | 1 | CVD19-SEVERE-D | CVD19-ASYMPT   | Fc receptor-like protein 4                             |
| P0CG04 | IGLC1     | 7  | 2  | 86.32  | 4.1E-07 | 2.0E-06 | 3.41 | 1 | CVD19-SEVERE-D | CVD19-ASYMPT   | Immunoglobulin lambda constant 1                       |
| B9A064 | IGLL5     | 8  | 2  | 111.36 | 4.1E-07 | 2.0E-06 | 3.41 | 1 | CVD19-SEVERE-D | CVD19-ASYMPT   | Immunoglobulin lambda-like polypeptide 5               |
| Q8TBH0 | ARRDC2    | 1  | 1  | 5.26   | 4.9E-06 | 1.2E-05 | 3.39 | 1 | CVD19-SEVERE-R | CVD19-MILD     | Arrestin domain-containing protein 2                   |
| P02753 | RBP4      | 7  | 7  | 69.65  | 3.0E-06 | 8.5E-06 | 3.37 | 1 | CVD19-         | CVD19-         | Retinol-binding protein 4                              |

|        |              |     |    |         |         |         |      |   | SEVERE-D       | MODERATE       |                                                         |
|--------|--------------|-----|----|---------|---------|---------|------|---|----------------|----------------|---------------------------------------------------------|
| P00751 | <b>CFB</b>   | 31  | 29 | 254.30  | 2.5E-06 | 7.3E-06 | 3.35 | 1 | CVD19-MILD     | CVD19-ASYMPT   | Complement factor B                                     |
| Q86T90 | KIAA1328     | 2   | 1  | 12.71   | 5.3E-06 | 1.2E-05 | 3.28 | 1 | CVD19-MILD     | CVD19-SEVERE-R | Protein hinderin                                        |
| Q16610 | ECM1         | 5   | 5  | 27.20   | 3.6E-05 | 6.4E-05 | 3.14 | 1 | CVD19-MODERATE | CVD19-SEVERE-R | Extracellular matrix protein 1                          |
| P01700 | IGLV1-47     | 2   | 2  | 13.43   | 6.1E-05 | 1.0E-04 | 3.13 | 1 | CVD19-SEVERE-D | CVD19-SEVERE-R | Immunoglobulin lambda variable 1-47                     |
| P05156 | <b>CFI</b>   | 16  | 14 | 117.60  | 1.9E-07 | 1.5E-06 | 3.09 | 1 | CVD19-SEVERE-D | CVD19-ASYMPT   | Complement factor I                                     |
| Q8N9R8 | SCAI         | 2   | 1  | 16.37   | 8.4E-05 | 1.3E-04 | 3.02 | 1 | CVD19-SEVERE-D | CVD19-MODERATE | Protein SCAI                                            |
| P02647 | <b>APOA1</b> | 58  | 55 | 551.11  | 8.2E-07 | 3.2E-06 | 2.94 | 1 | CVD19-MILD     | CVD19-MODERATE | Apolipoprotein A-I                                      |
| P02747 | C1QC         | 2   | 2  | 13.53   | 6.5E-05 | 1.0E-04 | 2.91 | 1 | CVD19-MILD     | CVD19-SEVERE-R | Complement C1q subcomponent subunit C                   |
| P01023 | A2M          | 108 | 89 | 1095.40 | 9.9E-06 | 2.1E-05 | 2.87 | 1 | CVD19-SEVERE-D | CVD19-MODERATE | Alpha-2-macroglobulin                                   |
| Q8IWJ2 | GCC2         | 5   | 3  | 36.33   | 6.2E-05 | 1.0E-04 | 2.86 | 1 | CVD19-SEVERE-D | CVD19-MODERATE | GRIP and coiled-coil domain-containing protein 2        |
| Q03591 | <b>CFHR1</b> | 9   | 4  | 78.33   | 5.6E-05 | 9.4E-05 | 2.85 | 1 | CVD19-SEVERE-D | CVD19-SEVERE-R | Complement factor H-related protein 1                   |
| P43652 | AFM          | 25  | 23 | 192.08  | 1.1E-05 | 2.3E-05 | 2.82 | 1 | CVD19-SEVERE-R | CVD19-MILD     | Afamin                                                  |
| P02649 | APOE         | 22  | 22 | 221.62  | 2.9E-05 | 5.3E-05 | 2.66 | 1 | CVD19-SEVERE-D | CVD19-MILD     | Apolipoprotein E                                        |
| O94887 | FARP2        | 4   | 3  | 21.02   | 3.2E-05 | 5.8E-05 | 2.64 | 1 | CVD19-ASYMPT   | CVD19-SEVERE-R | FERM_ ARHGEF and pleckstrin domain-containing protein 2 |
| O14791 | APOL1        | 4   | 4  | 24.46   | 5.4E-05 | 9.2E-05 | 2.59 | 1 | CVD19-MILD     | CVD19-ASYMPT   | Apolipoprotein L1                                       |
| P06396 | <b>GSN</b>   | 13  | 13 | 76.00   | 7.4E-06 | 1.7E-05 | 2.59 | 1 | CVD19-SEVERE-D | CVD19-ASYMPT   | Gelsolin                                                |
| P02686 | MBP          | 2   | 2  | 11.09   | 6.3E-05 | 1.0E-04 | 2.55 | 1 | CVD19-ASYMPT   | CVD19-SEVERE-D | Myelin basic protein                                    |
| P62736 | ACTA2        | 4   | 3  | 22.72   | 1.8E-05 | 3.5E-05 | 2.50 | 1 | CVD19-SEVERE-R | CVD19-ASYMPT   | Actin_ aortic smooth muscle                             |

|        |          |    |    |        |         |         |      |   |                |                |                                                             |
|--------|----------|----|----|--------|---------|---------|------|---|----------------|----------------|-------------------------------------------------------------|
| P00747 | PLG      | 35 | 35 | 314.73 | 3.2E-05 | 5.8E-05 | 2.49 | 1 | CVD19-MILD     | CVD19-SEVERE-R | Plasminogen                                                 |
| P10909 | CLU      | 19 | 17 | 160.45 | 6.5E-05 | 1.0E-04 | 2.45 | 1 | CVD19-SEVERE-D | CVD19-MILD     | Clusterin                                                   |
| P01624 | IGKV3-15 | 1  | 1  | 5.90   | 5.3E-05 | 9.0E-05 | 2.43 | 1 | CVD19-MILD     | CVD19-MODERATE | Immunoglobulin kappa variable 3-15                          |
| P0DOX6 |          | 19 | 6  | 172.03 | 2.0E-06 | 6.1E-06 | 2.32 | 1 | CVD19-ASYMPT   | CVD19-MILD     | Immunoglobulin mu heavy chain                               |
| P01871 | IGHM     | 18 | 5  | 226.80 | 2.0E-06 | 6.1E-06 | 2.32 | 1 | CVD19-ASYMPT   | CVD19-MILD     | Immunoglobulin heavy constant mu                            |
| P05109 | S100A8   | 3  | 2  | 27.72  | 6.8E-05 | 1.1E-04 | 2.29 | 1 | CVD19-SEVERE-D | CVD19-MILD     | Protein S100-A8                                             |
| Q6ZN16 | MAP3K15  | 5  | 3  | 33.38  | 5.8E-05 | 9.6E-05 | 2.18 | 1 | CVD19-MILD     | CVD19-ASYMPT   | Mitogen-activated protein kinase kinase 15                  |
| P02748 | C9       | 4  | 4  | 23.98  | 5.8E-05 | 9.6E-05 | 2.16 | 1 | CVD19-MODERATE | CVD19-SEVERE-D | Complement component C9                                     |
| Q9GZT3 | SLIRP    | 1  | 1  | 12.71  | 4.7E-06 | 1.1E-05 | 2.14 | 1 | CVD19-SEVERE-D | CVD19-MODERATE | SRA stem-loop-interacting RNA-binding protein_mitochondrial |
| Q9P219 | CCDC88C  | 4  | 3  | 22.84  | 1.5E-06 | 4.9E-06 | 2.08 | 1 | CVD19-MODERATE | CVD19-MILD     | Protein Daple                                               |

**Note**

Highlighted in bold are some of the proteins that have also been previously identified by Messner et al (<sup>12</sup>).

Supplementary Table S2: List of the 91 differentially expressed proteins between samples from MERS-CoV patients with different disease severity and samples from control subjects.

**Supplementary Table S2 List of the 91 differentially expressed proteins between samples from different severity of MERS-CoV patients and control subjects**

| Accession | Gene Name | Peptide Count | Unique Peptides | Confidence Score | Anova (P) | q-Value | Max Fold Change | Power | Highest Mean Condition | Lowest Mean Condition | Description                            |
|-----------|-----------|---------------|-----------------|------------------|-----------|---------|-----------------|-------|------------------------|-----------------------|----------------------------------------|
| P01602    | IGKV1-5   | 3             | 2               | 37.88            | 2.3E-06   | 5.2E-05 | 4.33            | 1     | MERS-CoV-ICU-R         | MERS-CoV-CONTROL      | Immunoglobulin kappa variable 1-5      |
| P02654    | APOC1     | 4             | 4               | 58.12            | 9.2E-06   | 7.1E-05 | 21.11           | 1     | MERS-CoV-ICU-D         | MERS-CoV-CONTROL      | Apolipoprotein C-I                     |
| Q5TD97    | FHL5      | 5             | 3               | 26.72            | 9.2E-06   | 7.1E-05 | 6.84            | 1     | MERS-CoV-CONTROL       | MERS-CoV-ICU-R        | Four and a half LIM domains protein 5  |
| P61626    | LYZ       | 2             | 1               | 12.29            | 1.4E-05   | 8.1E-05 | 1012.21         | 1     | MERS-CoV-ICU-D         | MERS-CoV-CONTROL      | Lysozyme C                             |
| Q9BXR6    | CFHR5     | 3             | 2               | 25.91            | 2.2E-05   | 8.1E-05 | 6.22            | 1     | MERS-CoV-ICU-D         | MERS-CoV-CONTROL      | Complement factor H-related protein 5  |
| P01767    | IGHV3-53  | 6             | 1               | 57.78            | 2.7E-05   | 8.1E-05 | 8.23            | 1     | MERS-CoV-ICU-D         | MERS-CoV-ICU-R        | Immunoglobulin heavy variable 3-53     |
| P0DJH8    | SAA1      | 15            | 9               | 186.66           | 2.8E-05   | 8.1E-05 | 66.86           | 1     | MERS-CoV-ICU-D         | MERS-CoV-CONTROL      | Serum amyloid A-1 protein              |
| P02144    | MB        | 1             | 1               | 6.32             | 4.0E-05   | 9.6E-05 | 4191.63         | 1     | MERS-CoV-ICU-D         | MERS-CoV-CONTROL      | Myoglobin                              |
| P80748    | IGLV3-21  | 3             | 2               | 24.29            | 4.1E-05   | 9.6E-05 | 2.13            | 1     | MERS-CoV-ICU-D         | MERS-CoV-CONTROL      | Immunoglobulin lambda variable 3-21    |
| Q9UK55    | SERPINA10 | 6             | 6               | 41.55            | 5.0E-05   | 9.9E-05 | 17.39           | 1     | MERS-CoV-ICU-D         | MERS-CoV-CONTROL      | Protein Z-dependent protease inhibitor |
| P02741    | CRP       | 11            | 10              | 92.35            | 5.1E-05   | 9.9E-05 | 9.27            | 1     | MERS-CoV-ICU-          | MERS-CoV-             | C-reactive protein                     |

|            |           |    |    |        |         |         |       |       | D                | CONTROL          |                                                                               |
|------------|-----------|----|----|--------|---------|---------|-------|-------|------------------|------------------|-------------------------------------------------------------------------------|
| O15068     | MCF2L     | 5  | 4  | 33.79  | 8.2E-05 | 1.5E-04 | 2.63  | 1     | MERS-CoV-CONTROL | MERS-CoV-ICU-R   | Guanine nucleotide exchange factor DBS                                        |
| P08582     | MELTF     | 3  | 1  | 14.19  | 1.5E-04 | 2.4E-04 | 4.23  | 1     | MERS-CoV-CONTROL | MERS-CoV-ICU-R   | Melanotransferrin                                                             |
| Q9UBU6     | FAM8A1    | 3  | 1  | 15.90  | 1.6E-04 | 2.4E-04 | 7.41  | 1     | MERS-CoV-CONTROL | MERS-CoV-ICU-R   | Protein FAM8A1                                                                |
| A0A0A0MRZ8 | IGKV3D-11 | 1  | 1  | 16.13  | 2.5E-04 | 3.4E-04 | 10.43 | 1     | MERS-CoV-ICU-R   | MERS-CoV-ICU-D   | Immunoglobulin kappa variable 3D-11                                           |
| Q81YU8     | MICU2     | 2  | 1  | 18.49  | 2.5E-04 | 3.4E-04 | 5.47  | 1     | MERS-CoV-ICU-R   | MERS-CoV-CONTROL | Calcium uptake protein 2_mitochondrial                                        |
| Q86VH2     | KIF27     | 3  | 2  | 23.21  | 2.8E-04 | 3.5E-04 | 5.12  | 1     | MERS-CoV-CONTROL | MERS-CoV-ICU-R   | Kinesin-like protein KIF27                                                    |
| Q9UJW3     | DNMT3L    | 2  | 2  | 16.53  | 3.0E-04 | 3.7E-04 | 14.57 | 1     | MERS-CoV-ICU-D   | MERS-CoV-CONTROL | DNA (cytosine-5)-methyltransferase 3-like                                     |
| P01880     | IGHD      | 2  | 2  | 17.87  | 3.8E-04 | 4.4E-04 | 2.80  | 1.000 | MERS-CoV-CONTROL | MERS-CoV-ICU-R   | Immunoglobulin heavy constant delta OS=Homo sapiens OX=9606 GN=IGHD PE=1 SV=3 |
| P0DJ19     | SAA2      | 11 | 5  | 174.31 | 4.5E-04 | 5.0E-04 | 15.06 | 1.000 | MERS-CoV-ICU-D   | MERS-CoV-CONTROL | Serum amyloid A-2 protein                                                     |
| P02750     | LRG1      | 19 | 19 | 238.03 | 7.5E-04 | 7.6E-04 | 15.84 | 1.000 | MERS-CoV-ICU-D   | MERS-CoV-CONTROL | Leucine-rich alpha-2-glycoprotein                                             |
| A0A075B6S2 | IgG-kappa | 2  | 2  | 20.58  | 7.7E-04 | 7.6E-04 | 2.34  | 1.000 | MERS-CoV-ICU-R   | MERS-CoV-ICU-D   | Immunoglobulin kappa variable 2D-29                                           |
| P0C1K2     | TAT       | 1  | 1  | 11.12  | 7.9E-04 | 7.6E-04 | 2.82  | 1.000 | MERS-CoV-ICU-D   | MERS-CoV-CONTROL | Protein Tat                                                                   |
| P61769     | B2M       | 3  | 3  | 29.21  | 9.5E-04 | 8.8E-04 | 10.23 | 1.000 | MERS-CoV-ICU-    | MERS-CoV-        | Beta-2-microglobulin                                                          |

|            |          |     |     |         |         |         |      |       |                  |                  |                                       |
|------------|----------|-----|-----|---------|---------|---------|------|-------|------------------|------------------|---------------------------------------|
|            |          |     |     |         |         |         |      |       | D                | CONTROL          |                                       |
| P22792     | CPN2     | 10  | 8   | 81.05   | 1.1E-03 | 9.6E-04 | 3.92 | 1.000 | MERS-CoV-ICU-D   | MERS-CoV-CONTROL | Carboxypeptidase N subunit 2          |
| P05452     | CLEC3B   | 3   | 3   | 24.54   | 1.2E-03 | 9.6E-04 | 2.15 | 1.000 | MERS-CoV-CONTROL | MERS-CoV-ICU-D   | Tetranectin                           |
| P02768     | ALB      | 121 | 114 | 1017.37 | 1.2E-03 | 9.6E-04 | 5.42 | 1.000 | MERS-CoV-CONTROL | MERS-CoV-ICU-R   | Serum albumin                         |
| P53701     | HCCS     | 2   | 2   | 11.73   | 1.3E-03 | 9.9E-04 | 8.51 | 1.000 | MERS-CoV-ICU-D   | MERS-CoV-CONTROL | Cytochrome c-type heme lyase          |
| P01762     | IGHV3-11 | 3   | 1   | 30.91   | 1.3E-03 | 1.0E-03 | 4.24 | 0.998 | MERS-CoV-ICU-R   | MERS-CoV-ICU-D   | Immunoglobulin heavy variable 3-11    |
| O75161     | NPHP4    | 3   | 2   | 17.96   | 1.4E-03 | 1.0E-03 | 3.10 | 1.000 | MERS-CoV-CONTROL | MERS-CoV-ICU-D   | Nephrocystin-4                        |
| P01019     | AGT      | 15  | 15  | 138.04  | 1.5E-03 | 1.0E-03 | 6.46 | 0.999 | MERS-CoV-ICU-D   | MERS-CoV-CONTROL | Angiotensinogen                       |
| A2RTY3     | HEATR9   | 3   | 2   | 22.64   | 1.6E-03 | 1.1E-03 | 4.15 | 0.997 | MERS-CoV-ICU-D   | MERS-CoV-ICU-R   | Protein HEATR9                        |
| P15169     | CPN1     | 5   | 5   | 38.89   | 2.2E-03 | 1.5E-03 | 3.41 | 0.999 | MERS-CoV-ICU-D   | MERS-CoV-CONTROL | Carboxypeptidase N catalytic chain    |
| Q16763     | UBE2S    | 1   | 1   | 5.76    | 2.7E-03 | 1.7E-03 | 3.87 | 0.994 | MERS-CoV-ICU-R   | MERS-CoV-CONTROL | Ubiquitin-conjugating enzyme E2 S     |
| P24994     | GB       | 3   | 2   | 18.53   | 2.8E-03 | 1.7E-03 | 2.07 | 0.996 | MERS-CoV-CONTROL | MERS-CoV-ICU-D   | Envelope glycoprotein B               |
| P02746     | C1QB     | 9   | 8   | 64.61   | 2.8E-03 | 1.7E-03 | 2.80 | 0.998 | MERS-CoV-ICU-D   | MERS-CoV-CONTROL | Complement C1q subcomponent subunit B |
| A0A075B6N3 | TRBV24-1 | 4   | 3   | 29.91   | 3.1E-03 | 1.8E-03 | 3.72 | 0.997 | MERS-CoV-        | MERS-CoV-ICU-    | T cell receptor beta variable 24-1    |



|        |          |    |    |        |         |         |      |       | CONTROL          | R                |                                                                        |
|--------|----------|----|----|--------|---------|---------|------|-------|------------------|------------------|------------------------------------------------------------------------|
| P35858 | IGFALS   | 16 | 15 | 109.65 | 3.1E-03 | 1.8E-03 | 5.50 | 0.984 | MERS-CoV-ICU-D   | MERS-CoV-ICU-R   | Insulin-like growth factor-binding protein complex acid labile subunit |
| P13671 | C6       | 27 | 24 | 206.27 | 3.2E-03 | 1.8E-03 | 3.26 | 0.997 | MERS-CoV-ICU-D   | MERS-CoV-CONTROL | Complement component C6                                                |
| Q14624 | ITIH4    | 49 | 46 | 510.91 | 3.4E-03 | 1.9E-03 | 2.06 | 0.991 | MERS-CoV-CONTROL | MERS-CoV-ICU-R   | Inter-alpha-trypsin inhibitor heavy chain H4                           |
| Q8IZU1 | FAM9A    | 2  | 2  | 17.57  | 3.8E-03 | 2.0E-03 | 6.86 | 0.994 | MERS-CoV-ICU-R   | MERS-CoV-CONTROL | Protein FAM9A                                                          |
| P04278 | SHBG     | 4  | 3  | 22.66  | 4.3E-03 | 2.1E-03 | 5.35 | 0.990 | MERS-CoV-ICU-D   | MERS-CoV-CONTROL | Sex hormone-binding globulin                                           |
| Q961Y4 | CPB2     | 5  | 4  | 30.46  | 4.3E-03 | 2.1E-03 | 2.32 | 0.984 | MERS-CoV-ICU-D   | MERS-CoV-CONTROL | Carboxypeptidase B2                                                    |
| Q9Y4P8 | WIPI2    | 3  | 2  | 27.43  | 4.9E-03 | 2.4E-03 | 8.86 | 0.988 | MERS-CoV-ICU-D   | MERS-CoV-CONTROL | WD repeat domain phosphoinositide-interacting protein 2                |
| P02675 | FGB      | 63 | 62 | 651.32 | 5.1E-03 | 2.4E-03 | 3.85 | 0.981 | MERS-CoV-ICU-D   | MERS-CoV-CONTROL | Fibrinogen beta chain                                                  |
| Q9Y2V7 | COG6     | 3  | 2  | 27.28  | 5.2E-03 | 2.4E-03 | 2.03 | 0.984 | MERS-CoV-CONTROL | MERS-CoV-ICU-D   | Conserved oligomeric Golgi complex subunit 6                           |
| P00751 | CFB      | 35 | 33 | 410.83 | 5.3E-03 | 2.4E-03 | 4.57 | 0.975 | MERS-CoV-ICU-D   | MERS-CoV-CONTROL | Complement factor B                                                    |
| P01009 | SERPINA1 | 68 | 66 | 652.18 | 5.4E-03 | 2.4E-03 | 4.13 | 0.976 | MERS-CoV-ICU-D   | MERS-CoV-CONTROL | Alpha-1-antitrypsin                                                    |
| P01011 | SERPINA3 | 39 | 36 | 375.56 | 5.4E-03 | 2.4E-03 | 4.09 | 0.981 | MERS-CoV-ICU-D   | MERS-CoV-CONTROL | Alpha-1-antichymotrypsin                                               |
| P25311 | AZGP1    | 22 | 20 | 243.28 | 6.1E-03 | 2.7E-03 | 5.28 | 0.977 | MERS-CoV-ICU-    | MERS-CoV-        | Zinc-alpha-2-glycoprotein                                              |

|        |           |    |    |        |         |         |          |       | D                | CONTROL          |                                                         |
|--------|-----------|----|----|--------|---------|---------|----------|-------|------------------|------------------|---------------------------------------------------------|
| Q15020 | SART3     | 6  | 3  | 42.83  | 6.2E-03 | 2.7E-03 | 4.33     | 0.978 | MERS-CoV-CONTROL | MERS-CoV-ICU-D   | Squamous cell carcinoma antigen recognized by T-cells 3 |
| Q9BQY6 | WFDC6     | 1  | 1  | 12.09  | 6.5E-03 | 2.7E-03 | 4.70     | 0.968 | MERS-CoV-ICU-D   | MERS-CoV-CONTROL | WAP four-disulfide core domain protein 6                |
| P02655 | APOC2     | 4  | 4  | 53.36  | 6.7E-03 | 2.7E-03 | 2.12     | 0.974 | MERS-CoV-CONTROL | MERS-CoV-ICU-D   | Apolipoprotein C-II                                     |
| P02753 | RBP4      | 11 | 10 | 109.70 | 7.4E-03 | 3.0E-03 | 3.05     | 0.960 | MERS-CoV-ICU-D   | MERS-CoV-CONTROL | Retinol-binding protein 4                               |
| P02766 | TTR       | 3  | 3  | 28.40  | 8.1E-03 | 3.2E-03 | 4.74     | 0.949 | MERS-CoV-ICU-D   | MERS-CoV-CONTROL | Transthyretin                                           |
| P0DL12 | SMIM17    | 1  | 1  | 5.42   | 8.3E-03 | 3.2E-03 | 2.51     | 0.942 | MERS-CoV-ICU-D   | MERS-CoV-CONTROL | Small integral membrane protein 17                      |
| P02679 | FGG       | 42 | 40 | 558.08 | 8.4E-03 | 3.2E-03 | 4.05     | 0.943 | MERS-CoV-ICU-D   | MERS-CoV-CONTROL | Fibrinogen gamma chain                                  |
| Q77376 | VPU       | 1  | 1  | 5.37   | 8.7E-03 | 3.2E-03 | Infinity | 0.936 | MERS-CoV-ICU-D   | MERS-CoV-CONTROL | Protein Vpu                                             |
| P02760 | AMBP      | 16 | 15 | 182.80 | 8.7E-03 | 3.2E-03 | 3.87     | 0.951 | MERS-CoV-ICU-D   | MERS-CoV-CONTROL | Protein AMBP                                            |
| P02656 | APOC3     | 6  | 5  | 57.82  | 8.7E-03 | 3.2E-03 | 3.04     | 0.960 | MERS-CoV-ICU-D   | MERS-CoV-CONTROL | Apolipoprotein C-III                                    |
| P09871 | C1S       | 19 | 18 | 142.82 | 9.0E-03 | 3.2E-03 | 2.24     | 0.937 | MERS-CoV-ICU-D   | MERS-CoV-CONTROL | Complement C1s subcomponent                             |
| Q6ZRV3 | LINC00696 | 2  | 2  | 15.96  | 9.1E-03 | 3.2E-03 | 5.57     | 0.936 | MERS-CoV-ICU-D   | MERS-CoV-CONTROL | Putative uncharacterized protein encoded by LINC00696   |
| P08603 | CFH       | 65 | 55 | 721.35 | 1.1E-02 | 3.7E-03 | 3.60     | 0.909 | MERS-CoV-ICU-    | MERS-CoV-        | Complement factor H                                     |

|            |          |    |    |        |         |         |      |       |                |                  |                                       |
|------------|----------|----|----|--------|---------|---------|------|-------|----------------|------------------|---------------------------------------|
|            |          |    |    |        |         |         |      |       | D              | CONTROL          |                                       |
| P01764     | IGHV3-23 | 4  | 1  | 36.55  | 1.1E-02 | 3.7E-03 | 2.44 | 0.869 | MERS-CoV-ICU-R | MERS-CoV-ICU-D   | Immunoglobulin heavy variable 3-23    |
| Q81020     | E1       | 3  | 1  | 33.15  | 1.2E-02 | 3.9E-03 | 3.44 | 0.899 | MERS-CoV-ICU-D | MERS-CoV-CONTROL | Replication protein E1                |
| P10643     | C7       | 27 | 25 | 222.30 | 1.3E-02 | 4.0E-03 | 2.03 | 0.926 | MERS-CoV-ICU-D | MERS-CoV-CONTROL | Complement component C7               |
| P02671     | FGA      | 72 | 66 | 681.22 | 1.3E-02 | 4.1E-03 | 3.08 | 0.892 | MERS-CoV-ICU-D | MERS-CoV-CONTROL | Fibrinogen alpha chain                |
| P04004     | VTN      | 23 | 21 | 196.08 | 1.3E-02 | 4.2E-03 | 2.99 | 0.894 | MERS-CoV-ICU-D | MERS-CoV-CONTROL | Vitronectin                           |
| P02748     | C9       | 25 | 22 | 235.24 | 1.4E-02 | 4.3E-03 | 3.22 | 0.885 | MERS-CoV-ICU-D | MERS-CoV-CONTROL | Complement component C9               |
| A0A075B6I9 | IGLV7-46 | 1  | 1  | 6.44   | 1.5E-02 | 4.3E-03 | 3.08 | 0.843 | MERS-CoV-ICU-R | MERS-CoV-ICU-D   | Immunoglobulin lambda variable 7-46   |
| P08185     | SERPINA6 | 11 | 11 | 74.63  | 1.5E-02 | 4.3E-03 | 3.97 | 0.879 | MERS-CoV-ICU-D | MERS-CoV-CONTROL | Corticosteroid-binding globulin       |
| P51884     | LUM      | 13 | 12 | 111.67 | 1.5E-02 | 4.3E-03 | 2.12 | 0.816 | MERS-CoV-ICU-R | MERS-CoV-ICU-D   | Lumican                               |
| Q99966     | CITED1   | 1  | 1  | 11.62  | 1.5E-02 | 4.3E-03 | 2.27 | 0.903 | MERS-CoV-ICU-R | MERS-CoV-CONTROL | Cbp/p300-interacting transactivator 1 |
| P12605     | F        | 3  | 2  | 32.38  | 1.5E-02 | 4.3E-03 | 4.90 | 0.885 | MERS-CoV-ICU-D | MERS-CoV-CONTROL | Fusion glycoprotein F0                |
| P04003     | C4BPA    | 23 | 21 | 244.10 | 1.5E-02 | 4.3E-03 | 2.40 | 0.816 | MERS-CoV-ICU-D | MERS-CoV-ICU-R   | C4b-binding protein alpha chain       |
| P07360     | C8G      | 9  | 7  | 75.41  | 1.9E-02 | 5.0E-03 | 3.11 | 0.799 | MERS-CoV-ICU-  | MERS-CoV-        | Complement component C8 gamma chain   |

|        |          |    |    |        |         |         |        |       |                  |                  |                                                         |
|--------|----------|----|----|--------|---------|---------|--------|-------|------------------|------------------|---------------------------------------------------------|
|        |          |    |    |        |         |         |        |       | D                | CONTROL          |                                                         |
| P02763 | ORM1     | 21 | 13 | 192.10 | 2.0E-02 | 5.1E-03 | 2.23   | 0.836 | MERS-CoV-ICU-D   | MERS-CoV-CONTROL | Alpha-1-acid glycoprotein 1                             |
| P19652 | ORM2     | 13 | 9  | 168.28 | 2.1E-02 | 5.2E-03 | 3.16   | 0.803 | MERS-CoV-ICU-D   | MERS-CoV-CONTROL | Alpha-1-acid glycoprotein 2                             |
| Q8NCR0 | B3GALNT2 | 3  | 2  | 17.34  | 2.3E-02 | 5.7E-03 | 3.29   | 0.823 | MERS-CoV-ICU-R   | MERS-CoV-CONTROL | UDP-GalNAc:beta-1_3-N-acetylgalactosaminyltransferase 2 |
| P35542 | SAA4     | 6  | 6  | 44.55  | 2.3E-02 | 5.7E-03 | 2.11   | 0.834 | MERS-CoV-CONTROL | MERS-CoV-ICU-D   | Serum amyloid A-4 protein                               |
| P61129 | ZC3H6    | 2  | 1  | 22.10  | 2.4E-02 | 5.8E-03 | 17.46  | 0.834 | MERS-CoV-ICU-D   | MERS-CoV-CONTROL | Zinc finger CCCH domain-containing protein 6            |
| Q96LZ3 | PPP3R2   | 3  | 3  | 14.46  | 2.5E-02 | 5.9E-03 | 2.69   | 0.818 | MERS-CoV-ICU-D   | MERS-CoV-CONTROL | Calcineurin subunit B type 2                            |
| P01877 | IGHA2    | 20 | 1  | 216.24 | 2.6E-02 | 6.0E-03 | 2.50   | 0.805 | MERS-CoV-CONTROL | MERS-CoV-ICU-R   | Immunoglobulin heavy constant alpha 2                   |
| Q81WB9 | TEX2     | 1  | 1  | 4.79   | 3.3E-02 | 7.3E-03 | 172.02 | 0.762 | MERS-CoV-CONTROL | MERS-CoV-ICU-D   | Testis-expressed protein 2                              |
| P02749 | APOH     | 20 | 20 | 241.96 | 3.8E-02 | 8.1E-03 | 3.20   | 0.700 | MERS-CoV-ICU-D   | MERS-CoV-CONTROL | Beta-2-glycoprotein 1                                   |
| P05155 | SERPING1 | 21 | 19 | 222.54 | 3.8E-02 | 8.1E-03 | 3.00   | 0.693 | MERS-CoV-ICU-D   | MERS-CoV-CONTROL | Plasma protease C1 inhibitor                            |
| P22352 | GPX3     | 6  | 5  | 45.64  | 3.9E-02 | 8.2E-03 | 2.25   | 0.709 | MERS-CoV-ICU-D   | MERS-CoV-CONTROL | Glutathione peroxidase 3                                |
| P27169 | PON1     | 13 | 12 | 163.45 | 4.0E-02 | 8.2E-03 | 2.46   | 0.602 | MERS-CoV-ICU-D   | MERS-CoV-ICU-R   | Serum paraoxonase/arylesterase 1                        |
| P04217 | A1BG     | 25 | 23 | 243.13 | 4.0E-02 | 8.2E-03 | 2.20   | 0.654 | MERS-CoV-ICU-    | MERS-CoV-        | Alpha-1B-glycoprotein                                   |

|        |         |   |   |       |         |         |      |       |                |                  |                                |
|--------|---------|---|---|-------|---------|---------|------|-------|----------------|------------------|--------------------------------|
|        |         |   |   |       |         |         |      |       | D              | CONTROL          |                                |
| Q8IX95 | CTAGE3P | 2 | 1 | 16.90 | 4.0E-02 | 8.2E-03 | 2.05 | 0.717 | MERS-CoV-ICU-R | MERS-CoV-CONTROL | Putative cTAGE family member 3 |
| P00746 | CFD     | 6 | 6 | 40.74 | 0.04633 | 9.2E-03 | 3.09 | 0.644 | MERS-CoV-ICU-D | MERS-CoV-CONTROL | Complement factor D            |

Supplementary Table S3: Functional and cellular processes of the 49 overlapping proteins between 193 and 91 differentially expressed proteins in COVID-19 and MERS-CoV, respectively.  
Supplementary Table S4: List of the 49 overlapping

**Supplementary Table S3:** Functional and cellular processes of the 49 overlapping proteins between 193 and 91 differentially expressed proteins in COVID-19 and MERS CoV respectively

| <b>Innate Immune System</b> | <b>Hemostasis</b> | <b>Complement cascade regulation</b> | <b>Platelet degranulation</b> | <b>Initial triggering of complement</b> | <b>Scavenger Receptors</b> | <b>Neutrophil degranulation</b> | <b>FCGR activation/<br/>NF-κB activation</b> |
|-----------------------------|-------------------|--------------------------------------|-------------------------------|-----------------------------------------|----------------------------|---------------------------------|----------------------------------------------|
| IGKV1-5                     | SERPING1          | SERPING1                             | SERPING1                      | GKV1-5                                  | IGKV1-5                    | A1BG                            | IGKV1-5                                      |
| CFHR5                       | IGKV1-5           | IGKV1-5                              | A1BG                          | IGLV3-21                                | SAA1                       | LRG1                            | IGLV3-21                                     |
| C9                          | A1BG              | CFHR5                                | ITIH4                         | IGHV3-53                                | IGLV3-21                   | CFD                             | IGHV3-53                                     |
| FGB                         | ITIH4             | C4BPA                                | ALB                           | IGHV3-23                                | AMBP                       | SERPINA3                        | IGHV3-23                                     |
| FGA                         | ALB               | C9                                   | CFD                           | IGHV3-11                                | IGHV3-53                   | ORM1                            | IGHV3-11                                     |
| B2M                         | CFD               | C1QB                                 | FGB                           | C1QB                                    | IGHV3-23                   | SERPINA1                        |                                              |
| LRG1                        | FGB               | CFD                                  | FGA                           | CFD                                     | ALB                        | B2M                             |                                              |
| IGHV3-53                    | FGA               | CRP                                  | CLEC3B                        | CRP                                     | IGHV3-11                   | ORM2                            |                                              |
| FGG                         | CLEC3B            | CFB                                  | FGG                           | CFB                                     |                            |                                 |                                              |
| IGHV3-11                    | IGLV3-21          | IGLV3-21                             | SERPINA3                      |                                         |                            |                                 |                                              |
| CPN2                        | IGHV3-53          | IGHV3-53                             | ORM1                          |                                         |                            |                                 |                                              |
| SERPING1                    | IGHV3-23          | IGHV3-23                             | SERPINA1                      |                                         |                            |                                 |                                              |
| SAA1                        | FGG               | IGHV3-11                             | ORM2                          |                                         |                            |                                 |                                              |
| A1BG                        | IGHV3-11          | CPN2                                 |                               |                                         |                            |                                 |                                              |
| C4BPA                       | SERPINA3          | VTN                                  |                               |                                         |                            |                                 |                                              |
| C1QB                        | ORM1              | C8G                                  |                               |                                         |                            |                                 |                                              |
| CFD                         | SERPINA1          | C6                                   |                               |                                         |                            |                                 |                                              |
| CRP                         | ZC3H6             |                                      |                               |                                         |                            |                                 |                                              |
| CFB                         | ORM2              |                                      |                               |                                         |                            |                                 |                                              |
| IGLV3-21                    |                   |                                      |                               |                                         |                            |                                 |                                              |
| IGHV3-23                    |                   |                                      |                               |                                         |                            |                                 |                                              |

SERPINA3  
ORM1  
VTN  
SERPINA1  
C8G  
C6



Supplementary Table S4: List of the 49 overlapping proteins between 193 and 91 differentially expressed proteins in COVID-19 and MERS-CoV respectively with their expressions shown among the COVID-19 samples. (Highlighted in bold are some of the proteins that have also been previously identified by Messner et al (12)).

**Supplementary Table S4: List of the 49 overlapping proteins between 193 and 91 differentially expressed proteins in COVID-19 and MERS CoV respectively with their expressions shown among the CODID-19 samples.**

| Accession | Gene Name   | Peptide count | Unique peptides | Confidence score | Anova (p) | q-Value  | Max fold change | Power | Highest mean condition | Lowest mean condition | Description                                             |
|-----------|-------------|---------------|-----------------|------------------|-----------|----------|-----------------|-------|------------------------|-----------------------|---------------------------------------------------------|
| P02144    | MB          | 4             | 4               | 33.29            | 2.5E-07   | 1.68E-06 | 50.75           | 1     | CVD19-SEVERE-D         | CVD19-ASYMPT          | Myoglobin                                               |
| P01602    | IGKV1-5     | 3             | 1               | 29.18            | 9.2E-07   | 3.45E-06 | 47.94           | 1     | CVD19-SEVERE-R         | CVD19-ASYMPT          | Immunoglobulin kappa variable 1-5                       |
| P22352    | GPX3        | 5             | 3               | 39.26            | 2.0E-05   | 3.92E-05 | 46.49           | 1     | CVD19-SEVERE-D         | CVD19-ASYMPT          | Glutathione peroxidase 3                                |
| P02741    | <b>CRP</b>  | 4             | 4               | 53.43            | 4.6E-06   | 1.14E-05 | 35.33           | 1     | CVD19-SEVERE-D         | CVD19-ASYMPT          | C-reactive protein                                      |
| P0DJ19    | <b>SAA2</b> | 10            | 3               | 143.11           | 2.5E-07   | 1.68E-06 | 27.24           | 1     | CVD19-SEVERE-D         | CVD19-MODERATE        | Serum amyloid A-2 protein                               |
| P02679    | <b>FGG</b>  | 15            | 15              | 170.01           | 2.1E-07   | 1.54E-06 | 25.38           | 1     | CVD19-MILD             | CVD19-SEVERE-R        | Fibrinogen gamma chain                                  |
| P0DJ18    | <b>SAA1</b> | 11            | 3               | 149.00           | 3.7E-07   | 1.96E-06 | 23.58           | 1     | CVD19-SEVERE-D         | CVD19-MILD            | Serum amyloid A-1 protein                               |
| P61769    | B2M         | 2             | 2               | 13.15            | 3.5E-07   | 1.91E-06 | 21.77           | 1     | CVD19-SEVERE-D         | CVD19-ASYMPT          | Beta-2-microglobulin                                    |
| P02746    | C1QB        | 1             | 1               | 10.64            | 7.1E-05   | 1.12E-04 | 17.63           | 1     | CVD19-MILD             | CVD19-ASYMPT          | Complement C1q subcomponent subunit B                   |
| Q15020    | SART3       | 3             | 2               | 25.60            | 9.3E-07   | 3.45E-06 | 16.74           | 1     | CVD19-SEVERE-D         | CVD19-ASYMPT          | Squamous cell carcinoma antigen recognized by T-cells 3 |
| P04004    | VTN         | 15            | 13              | 136.56           | 2.4E-06   | 6.97E-06 | 14.45           | 1     | CVD19-SEVERE-D         | CVD19-ASYMPT          | Vitronectin                                             |
| P02763    | ORM1        | 15            | 12              | 181.21           | 3.1E-10   | 3.08E-08 | 13.33           | 1     | CVD19-SEVERE-D         | CVD19-ASYMPT          | Alpha-1-acid glycoprotein 1                             |
| P01011    | SERPINA3    | 33            | 32              | 321.95           | 2.0E-07   | 1.52E-06 | 13.16           | 1     | CVD19-SEVERE-D         | CVD19-ASYMPT          | Alpha-1-antichymotrypsin                                |
| P02675    | <b>FGB</b>  | 26            | 26              | 284.37           | 4.2E-07   | 2.01E-06 | 12.14           | 1     | CVD19-MILD             | CVD19-ASYMPT          | Fibrinogen beta chain                                   |

|        |              |     |     |         |         |          |       |   |                |                |                                              |
|--------|--------------|-----|-----|---------|---------|----------|-------|---|----------------|----------------|----------------------------------------------|
| P02671 | FGA          | 22  | 22  | 202.85  | 2.3E-06 | 6.93E-06 | 11.50 | 1 | CVD19-MILD     | CVD19-MODERATE | Fibrinogen alpha chain                       |
| P19652 | ORM2         | 13  | 10  | 177.33  | 2.1E-08 | 3.92E-07 | 11.24 | 1 | CVD19-SEVERE-D | CVD19-ASYMPT   | Alpha-1-acid glycoprotein 2                  |
| P02750 | <b>LRG1</b>  | 13  | 13  | 134.36  | 2.6E-06 | 7.42E-06 | 11.20 | 1 | CVD19-SEVERE-D | CVD19-ASYMPT   | Leucine-rich alpha-2-glycoprotein            |
| P02654 | <b>APOC1</b> | 3   | 3   | 49.07   | 2.7E-07 | 1.80E-06 | 10.68 | 1 | CVD19-SEVERE-D | CVD19-MILD     | Apolipoprotein C-I                           |
| P08185 | SERPINA6     | 5   | 5   | 36.85   | 1.0E-05 | 2.12E-05 | 10.32 | 1 | CVD19-SEVERE-D | CVD19-ASYMPT   | Corticosteroid-binding globulin              |
| P05155 | SERPING1     | 18  | 16  | 174.03  | 1.4E-07 | 1.28E-06 | 10.25 | 1 | CVD19-SEVERE-D | CVD19-ASYMPT   | Plasma protease C1 inhibitor                 |
| O15068 | MCF2L        | 4   | 2   | 26.69   | 2.0E-05 | 3.83E-05 | 9.79  | 1 | CVD19-MILD     | CVD19-SEVERE-R | Guanine nucleotide exchange factor DBS       |
| P01009 | SERPINA1     | 52  | 51  | 575.19  | 5.0E-07 | 2.24E-06 | 9.31  | 1 | CVD19-SEVERE-D | CVD19-ASYMPT   | Alpha-1-antitrypsin                          |
| Q14624 | <b>ITIH4</b> | 30  | 29  | 280.90  | 4.3E-06 | 1.08E-05 | 9.31  | 1 | CVD19-MILD     | CVD19-SEVERE-R | Inter-alpha-trypsin inhibitor heavy chain H4 |
| P25311 | AZGP1        | 22  | 21  | 219.22  | 2.6E-08 | 4.01E-07 | 9.28  | 1 | CVD19-SEVERE-D | CVD19-ASYMPT   | Zinc-alpha-2-glycoprotein                    |
| P01019 | AGT          | 11  | 11  | 99.94   | 3.2E-07 | 1.86E-06 | 8.66  | 1 | CVD19-SEVERE-D | CVD19-MODERATE | Angiotensinogen                              |
| P35542 | SAA4         | 6   | 6   | 54.09   | 4.0E-05 | 6.99E-05 | 8.45  | 1 | CVD19-MILD     | CVD19-SEVERE-R | Serum amyloid A-4 protein                    |
| P07360 | C8G          | 5   | 4   | 28.66   | 1.6E-05 | 3.30E-05 | 7.04  | 1 | CVD19-SEVERE-D | CVD19-ASYMPT   | Complement component C8 gamma chain          |
| P02656 | APOC3        | 6   | 6   | 55.51   | 1.1E-06 | 3.88E-06 | 6.53  | 1 | CVD19-SEVERE-D | CVD19-ASYMPT   | Apolipoprotein C-III                         |
| P02768 | <b>ALB</b>   | 167 | 159 | 1276.86 | 8.3E-08 | 9.35E-07 | 6.49  | 1 | CVD19-MILD     | CVD19-SEVERE-R | Serum albumin 2                              |
| P02787 | <b>TF</b>    | 100 | 95  | 1031.64 | 7.8E-08 | 9.13E-07 | 6.28  | 1 | CVD19-MILD     | CVD19-SEVERE-R | Serotransferrin                              |
| P04003 | C4BPA        | 22  | 20  | 191.24  | 3.2E-06 | 8.83E-06 | 5.64  | 1 | CVD19-ASYMPT   | CVD19-SEVERE-R | C4b-binding protein alpha chain              |
| P80748 | IGLV3-21     | 3   | 3   | 21.17   | 2.1E-05 | 3.93E-05 | 5.04  | 1 | CVD19-SEVERE-D | CVD19-MODERATE | Immunoglobulin lambda variable 3-21          |

|        |              |     |    |         |         |          |       |      |                |                |                                              |
|--------|--------------|-----|----|---------|---------|----------|-------|------|----------------|----------------|----------------------------------------------|
| P02655 | <b>APOC2</b> | 4   | 4  | 46.78   | 2.4E-05 | 4.53E-05 | 4.29  | 1    | CVD19-SEVERE-D | CVD19-MODERATE | Apolipoprotein C-II                          |
| P22792 | CPN2         | 7   | 6  | 52.21   | 1.2E-06 | 4.25E-06 | 4.25  | 1    | CVD19-MILD     | CVD19-MODERATE | Carboxypeptidase N subunit 2                 |
| P02760 | AMBP         | 16  | 15 | 183.85  | 7.6E-06 | 1.69E-05 | 4.01  | 1    | CVD19-SEVERE-D | CVD19-MODERATE | Protein AMBP                                 |
| P02753 | RBP4         | 7   | 7  | 69.65   | 3.0E-06 | 8.46E-06 | 3.37  | 1    | CVD19-SEVERE-D | CVD19-MODERATE | Retinol-binding protein 4                    |
| P00751 | <b>CFB</b>   | 31  | 29 | 254.30  | 2.5E-06 | 7.30E-06 | 3.35  | 1    | CVD19-MILD     | CVD19-ASYMPT   | Complement factor B                          |
| P05156 | <b>CFI</b>   | 16  | 14 | 117.60  | 1.9E-07 | 1.50E-06 | 3.09  | 1    | CVD19-SEVERE-D | CVD19-ASYMPT   | Complement factor I                          |
| P02647 | <b>APOA1</b> | 58  | 55 | 551.11  | 8.2E-07 | 3.24E-06 | 2.94  | 1    | CVD19-MILD     | CVD19-MODERATE | Apolipoprotein A-I                           |
| P01023 | A2M          | 108 | 89 | 1095.40 | 9.9E-06 | 2.10E-05 | 2.87  | 1    | CVD19-SEVERE-D | CVD19-MODERATE | Alpha-2-macroglobulin                        |
| Q03591 | <b>CFHR1</b> | 9   | 4  | 78.33   | 5.6E-05 | 9.39E-05 | 2.85  | 1    | CVD19-SEVERE-D | CVD19-SEVERE-R | Complement factor H-related protein 1        |
| P06396 | <b>GSN</b>   | 13  | 13 | 76.00   | 7.4E-06 | 1.67E-05 | 2.59  | 1    | CVD19-SEVERE-D | CVD19-ASYMPT   | Gelsolin                                     |
| P02748 | C9           | 4   | 4  | 23.98   | 5.8E-05 | 9.59E-05 | 2.16  | 1    | CVD19-MODERATE | CVD19-SEVERE-D | Complement component C9                      |
| P00746 | CFD          | 3   | 3  | 18.75   | 2.1E-03 | 2.42E-03 | 42.77 | 0.99 | CVD19-SEVERE-D | CVD19-ASYMPT   | Complement factor D                          |
| Q9Y2V7 | COG6         | 2   | 1  | 21.87   | 1.6E-04 | 2.37E-04 | 8.77  | 1    | CVD19-MODERATE | CVD19-MILD     | Conserved oligomeric Golgi complex subunit 6 |
| P61129 | ZC3H6        | 3   | 1  | 33.32   | 4.9E-04 | 6.45E-04 | 6.61  | 0.99 | CVD19-MILD     | CVD19-SEVERE-R | Zinc finger CCCH domain-containing protein 6 |
| P04217 | A1BG         | 19  | 18 | 203.48  | 2.5E-03 | 2.82E-03 | 4.34  | 0.99 | CVD19-SEVERE-D | CVD19-ASYMPT   | Alpha-1B-glycoprotein                        |

|        |        |    |    |       |         |          |      |      |                |                |                      |
|--------|--------|----|----|-------|---------|----------|------|------|----------------|----------------|----------------------|
| P05452 | CLEC3B | 3  | 3  | 15.86 | 1.4E-04 | 2.07E-04 | 3.14 | 1    | CVD19-SEVERE-D | CVD19-MODERATE | Tetranectin          |
| P13671 | C6     | 13 | 12 | 78.51 | 1.2E-04 | 1.86E-04 | 2.75 | 1    | CVD19-MILD     | CVD19-SEVERE-R | Complement component |
| P51884 | LUM    | 4  | 3  | 28.59 | 5.9E-04 | 7.57E-04 | 2.55 | 0.99 | CVD19-SEVERE-D | CVD19-ASYMP    | Lumican              |
